# Supplementary material for: Epidemiological trends in COVID-19 pandemic: prospective critical appraisal of observations from six countries in Europe and the USA
Source: PubMed Central journal article supplement — BMJ Open. 2021 Apr 8;11(4):e045782. doi: 10.1136/bmjopen-2020-045782 (PMC8039252; doi:10.1136/bmjopen-2020-045782), 2021-04-08
Supplement: bmjopen-2020-045782.draft_revisions.pdf [file bmjopen-2020-045782.draft_revisions.pdf]

# BMJ Open

BMJ Open is committed to open peer review. As part of this commitment we make the peer review history of every article we publish publicly available.

When an article is published we post the peer reviewers' comments and the authors' responses online. We also post the versions of the paper that were used during peer review. These are the versions that the peer review comments apply to.

The versions of the paper that follow are the versions that were submitted during the peer review process. They are not the versions of record or the final published versions. They should not be cited or distributed as the published version of this manuscript.

BMJ Open is an open access journal and the full, final, typeset and author-corrected version of record of the manuscript is available on our site with no access controls, subscription charges or pay-per-view fees (<http://bmjopen.bmj.com>).

If you have any questions on BMJ Open's open peer review process please email [info.bmjopen@bmj.com](mailto:info.bmjopen@bmj.com)

# BMJ Open

## Epidemiological trends in Covid-19 pandemic: critical appraisal of observations from six countries

|                               |                                                                                                                                                                                                                                        |
|-------------------------------|----------------------------------------------------------------------------------------------------------------------------------------------------------------------------------------------------------------------------------------|
| Journal:                      | <i>BMJ Open</i>                                                                                                                                                                                                                        |
| Manuscript ID                 | bmjopen-2020-045782                                                                                                                                                                                                                    |
| Article Type:                 | Original research                                                                                                                                                                                                                      |
| Date Submitted by the Author: | 12-Oct-2020                                                                                                                                                                                                                            |
| Complete List of Authors:     | Velicu, Maria; King's College London, Neurosurgery<br>Furlanetti, Luciano; King's College Hospital, Neurosurgery<br>Jung, Josephine; King's College Hospital, Neurosurgery<br>Ashkan, Keyoumars; King's College Hospital, Neurosurgery |
| Keywords:                     | EPIDEMIOLOGY, COVID-19, International health services < HEALTH SERVICES ADMINISTRATION & MANAGEMENT, Epidemiology < INFECTIOUS DISEASES, Public health < INFECTIOUS DISEASES, Infection control < INFECTIOUS DISEASES                  |
|                               |                                                                                                                                                                                                                                        |

SCHOLARONE™  
Manuscripts

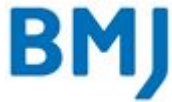

I, the Submitting Author has the right to grant and does grant on behalf of all authors of the Work (as defined in the below author licence), an exclusive licence and/or a non-exclusive licence for contributions from authors who are: i) UK Crown employees; ii) where BMJ has agreed a CC-BY licence shall apply, and/or iii) in accordance with the terms applicable for US Federal Government officers or employees acting as part of their official duties; on a worldwide, perpetual, irrevocable, royalty-free basis to BMJ Publishing Group Ltd ("BMJ") its licensees and where the relevant Journal is co-owned by BMJ to the co-owners of the Journal, to publish the Work in this journal and any other BMJ products and to exploit all rights, as set out in our [licence](#).

The Submitting Author accepts and understands that any supply made under these terms is made by BMJ to the Submitting Author unless you are acting as an employee on behalf of your employer or a postgraduate student of an affiliated institution which is paying any applicable article publishing charge ("APC") for Open Access articles. Where the Submitting Author wishes to make the Work available on an Open Access basis (and intends to pay the relevant APC), the terms of reuse of such Open Access shall be governed by a Creative Commons licence – details of these licences and which [Creative Commons](#) licence will apply to this Work are set out in our licence referred to above.

Other than as permitted in any relevant BMJ Author's Self Archiving Policies, I confirm this Work has not been accepted for publication elsewhere, is not being considered for publication elsewhere and does not duplicate material already published. I confirm all authors consent to publication of this Work and authorise the granting of this licence.

1  
2  
3 **Epidemiological trends in Covid-19 pandemic: critical appraisal of**  
4 **observations from six countries**  
5  
6  
7  
8

9 Maria Alexandra Velicu, MD, Luciano Furlanetti, MD, PhD, Josephine Jung, MD, PhD,  
10 Keyourmars Ashkan, MD  
11  
12

13  
14  
15 Department of Neurosurgery, King's College Hospital NHS Foundation Trust, London, UK  
16 King's Health Partners Academic Health Sciences Centre, London, UK  
17  
18

19  
20  
21  
22  
23  
24  
25 Running Title: Epidemiological trends in Covid-19 pandemic  
26

27 **Keywords:** COVID-19, SARS-CoV2, Prevalence, Infection Fatality Rate, Epidemiology  
28  
29

30  
31  
32  
33  
34  
35  
36  
37  
38  
39 **Correspondence:** Maria Alexandra Velicu, MD. Department of Neurosurgery, King's College  
40 Hospital Foundation Trust, Denmark Hill, London, SE5 9RS. U.K. Tel: +44-(0)203 299 3285.  
41 Email: [m.velicu@nhs.net](mailto:m.velicu@nhs.net)  
42  
43  
44  
45  
46

47 Abstract word count: 287

48 Main manuscript: 3986

49 Number of references: 30

50 Number of tables: 2

51 Number of figures: 3  
52  
53  
54  
55  
56  
57  
58  
59  
60

## ABSTRACT

**Introduction:** Europe was the epicentre of the Coronavirus disease 2019 (Covid-19) pandemic in March 2020, with the highest number of cases and deaths between March and April. In May, the infection numbers registered a fall followed by a second new rise, not proportionally reflected by an increase in the number of deaths. We aimed to investigate the relationship between disease prevalence and outcomes over time, to develop a predictive model, as well as appraising the potential contributing factors underpinning this complex relationship.

**Methods:** A prospective epidemiological study using data from six countries collected between 10<sup>th</sup> March and 4<sup>th</sup> September. Data on the number of daily hospital and intensive care unit (ICU) admissions with Covid-19 were gathered, and the infection fatality rate and the prevalence were calculated. Trends over time were analysed. A linear regression model was used to determine the association between the fatality rates and the number of admissions.

**Findings:** The prediction model confirmed the linear association between the fatality rates and the numbers of ICU and hospital admissions. The exception was during the peak of the Covid-19 pandemic when the model underestimated the fatalities indicating that a substantial number of deaths occurred outside of the hospitals. The fatality rates decreased in all countries from May until September regardless of the trends in prevalence, differences in healthcare systems or strategic variations in handling the pandemic.

**Interpretation:** The observed gradual reduction in Covid-19 fatality rates over time despite varying disease prevalence and public health measures across multiple countries warrants search for a biological explanation. Whilst our understanding of this novel virus grows, hospital and ICU admission rates remain effective predictors of patient outcomes which can be used as early warning signs for escalation of public health measures.

## ARTICLE SUMMARY

### STRENGTHS AND LIMITATIONS OF THIS STUDY

- Comprehensive data on mortality, hospital and ICU admissions were gathered from 6 countries from March to September 2020 on a daily basis
- Our data were verified from multiple sources for each country to ensure accuracy and consistency
- The analysis was adjusted for the number of Covid-19 tests performed to remove the confounding influence of variations in test numbers over time and between countries
- Different countries use different testing technology which may have different diagnostic accuracy
- There were variations in reporting between countries especially when multiple tests were done on the same individual

## INTRODUCTION

Coronavirus disease 2019 (COVID-19) was first reported in Wuhan (Hubei province, China) on 31 December 2019 and has emerged as a new zoonotic infectious disease, leading the World Health Organization (WHO) to declare, in early March, a global health emergency.(1) The SARS-CoV-2 (Severe Acute Respiratory Syndrome Coronaviruses-2), which is similar to other previously described coronaviruses, i.e. SARS-CoV-1 (Severe Acute Respiratory Syndrome Coronaviruses-1) and MERS-CoV (Middle East Respiratory Syndrome coronavirus), was identified as the pathogenic agent of COVID-19.(1) Initial studies have shown the SARS-CoV-2 to have higher transmissibility, but lower pathogenicity than that of SARS-CoV-1 and MERS-CoV .(1,2) About 81% of the COVID-19 symptomatic patients develop mild symptoms, such as headache, dry cough and fatigue. However, more severe cases can develop respiratory distress, sepsis, severe neurologic symptoms and multi-organ failure.(2) On 13<sup>th</sup> of March 2020, the WHO declared Europe the epicentre of the pandemic with more reported cases and deaths than the rest of the world combined, apart from the People's Republic of China. In Europe, a record number of new cases and deaths caused by Covid-19 occurred between March and beginning of April. This urged most of the European countries to adopt national lockdown measures in March, with the highest stringency levels worldwide.(1) The number of new cases and deaths consequently registered a fall, although by the end of May the distribution of new cases began to rise again. However, the trend in deaths continued downwards, indicating that the increase in cases was not leading to proportional increased mortality.(2)

To better understand these divergent trends, we analysed the data from five of the most severely affected European countries (Spain, Italy, France, Germany and the United Kingdom). Additionally, we studied data from the USA given the impact of Covid-19 on this country and its significantly different healthcare system from those in Europe. Using the data available, we estimated and compared the distribution of the infection fatality rates (IFR) over time and the prevalence for each country. We included in our study the numbers of intensive care unit (ICU) and hospital admissions and developed a predictive model for outcomes using these two parameters. We also discussed the potential explanations for the observed trends.

## METHODS

### Search strategy

Data on Covid-19 for each country were acquired from the Statistics and Research Coronavirus Pandemic section on *Our World in Data* website ([www.ourworldindata.org](http://www.ourworldindata.org)) as the first step. All data were then further verified with the official publicly available sources: for Spain, from the Spanish Ministry of Health daily reports ([www.mscbs.gob.es](http://www.mscbs.gob.es)), and the Science and Innovation Institute Carlos III ([www.iscii.es](http://www.iscii.es)), which made available datasets for public use about the number of tests and both hospital and ICU admission numbers; for Italy, from the Italian Ministry of Health ([www.salute.gov.it](http://www.salute.gov.it)), with detailed datasets published by the Presidency of the Council of Ministers - Department of Civil Protection ([www.datid-covid.italia.it](http://www.datid-covid.italia.it)); for Germany, from data published in the daily epidemiological bulletin from the Robert Koch Institute ([www.RKI.de](http://www.RKI.de)); for France, from datasets accessed from the French Public Health website ([www.satepublique.fr](http://www.satepublique.fr)); for UK, from datasets from the official governmental website ([www.gov.uk](http://www.gov.uk)); for USA, from the Centre of Disease Control and Prevention COVID Data Tracker website and US Department of Health and Human Services. Where contradictory information was found for a given variable, Ministry of Health or official data were given priority over other sources.

The process for Covid-19 case reporting underwent continuous change, and case notifications developed into more standardised procedures from May, when surveillance platforms, such as SiViES in Spain, NHS Test and Trace in the UK, SI-DEP in France and the internationally adopted contact tracing measures were implemented. Consistent data were available from 10<sup>th</sup> March and were collected from this date until 4<sup>th</sup> September 2020. For most countries, the number of tests refers to the number of Reverse Transcriptase Polymerase Chain Reaction (RT-PCR) tests performed. The RT-PCR is widely used as the reference standard for the diagnosis of Covid-19. The WHO published its first guidance on laboratory testing on 17<sup>th</sup> January(3) and further released a more comprehensive document on 19<sup>th</sup> March.(4)

Serological tests have also been used as an alternative or complement to RT-PCR in the diagnosis of acute infection. In some countries, such as the USA, serological tests have also

1  
2  
3 been included in the total number of tests,(5) while others have reported their results  
4 separately as in the UK.  
5  
6

### 7 **Data variables**

8  
9  
10 The variables included in our data analysis were the number of Covid-19 cases (new and  
11 cumulative), the number of deaths (new and cumulative), the number of tests (per day and  
12 cumulative), the daily number of confirmed Covid-19 hospitalised individuals, and the daily  
13 number of individuals admitted in the ICU diagnosed with Covid-19. The data collected were  
14 homogenous for each country, except for Spain, where the numbers displayed for ICU and  
15 hospital admissions were cumulative values; therefore, the analysis was performed without  
16 the linear regression.  
17  
18

19 The number of daily tests included in our calculations represent the tests that were reported  
20 during that day. Delays in case notification were up to nine days(6) and retrospective  
21 corrections were conducted regularly in all countries and amended in the subsequent  
22 epidemiological bulletins.(6–8) The approach for reporting multiple tests done on the same  
23 individual was not uniform for all countries and detailed information on how this was  
24 addressed was inconsistent; when available, the algorithm consisted of first positive or  
25 negative RT-PCR test being declared if there were similar results, and the first positive test  
26 declared if the results were contradictory.(6) As a result, overestimation of the number of  
27 individuals that were tested in each country can vary.  
28  
29

30 Worldwide testing capacity has improved with time and this was reflected in the daily number  
31 of tests performed. We estimated the prevalence as a proportion of positive individuals from  
32 the total tested, and this was adjusted for the number of tests, as a correction for testing  
33 fluctuations.(Figure 1) In order to measure disease severity, infection fatality rate was  
34 preferred over the case fatality rate, and was calculated as the proportion of new deaths from  
35 the disease out of the estimated number of infected individuals, based on WHO definition(9):  
36  
37

$$38 \text{ Infection fatality rate ( IFR, \% )} = \frac{\text{Number of deaths from disease}}{\text{Number of infected individuals}} \times 100$$

39  
40 Multiple methods have been described for the calculation of the IFRs; some studies have  
41 included the RT-PCR positive tests, while others have used the seroprevalence results. A  
42 systematic review of the published data on IFRs concluded that there was a high  
43  
44  
45  
46  
47  
48  
49  
50  
51  
52  
53  
54  
55  
56  
57  
58  
59  
60



1  
2  
3 heterogeneity among the estimates of IFRs, the calculation of which remains a challenging  
4 task.<sup>(10)</sup> Also, estimates made on seroprevalence surveys are likely to deliver slightly lower  
5 fatality rates when compared with those that are inferred from other forms of testing.<sup>(10)</sup> We  
6 have based our calculations on the number of RT-PCR tests given the more consistent  
7 availability of these data across the countries studied.  
8  
9  
10  
11  
12  
13  
14

### 15 **Statistical analysis**

16  
17  
18 Data analysis was carried out using IBM SPSS®. Parametric tests were applied, and Pearson's  
19 correlation calculated to determine the strength of the association between the IFR and the  
20 number of ICU and hospital admissions. The three parameters were examined using a  
21 multivariate linear regression, and an IFR prediction model was developed based on the  
22 results. Sample size was considered adequate to support the regression. A stepwise model  
23 was built for each country, with the regression equation calculated based on the results:  
24  
25  
26  
27  
28  
29

$$30 \quad \text{Infection Fatality Rate} = \text{intercept} + (b_1 \times X) + (b_2 \times Y)$$

31  
32 Where the analysis revealed better estimates for univariate regression, the best predictor was  
33 included in the model. If a bivariate regression was calculated, the model was examined for  
34 collinearity. The strength of the association in the model was assessed by calculating the effect  
35 size using *Cohen's f*. The linear regression was not validated in order to preserve the sample  
36 size. The epidemic curves including the course estimate of the IFR (observed and mean of  
37 predicted) and prevalence were plotted, and demographic characteristics were summarised  
38 for each country.  
39  
40  
41  
42  
43  
44  
45  
46  
47

### 48 **RESULTS**

49  
50 We developed the regression models based on the estimated values of the IFR and the  
51 prevalence. The fatality rate and the regression mean curves are displayed in Figures 2 and 3  
52 and their trends compared with the estimated prevalence.  
53  
54  
55  
56  
57  
58  
59  
60

The analysis for Germany showed a strong positive association with IFR for both ICU admissions ( $r(157)=0.912$ ,  $P<0.001$ ) and hospital admissions ( $r(154)=0.771$ ,  $P<0.001$ ). The number of ICU admissions was included as best predictor, and the regression showed the highest value for the determination coefficient ( $R^2=0.830$ ) with the univariate model. Table 1 summarises the descriptive statistics and analysis results. The high effect size ( $f=1.7$ ) validates the linear association between the two variables. The strong prediction model results in the overlapping of the fatality rate curves during the entire time frame (Figure 2).

Table 1. Linear regression analysis for each country, with results of the regression for ICU and/or hospital admissions. The results were included in the prediction model equation of the IFR.

(b, unstandardised beta coefficient; SE, standard error;  $\beta$ , standardised beta coefficient)

Note: Germany,  $R^2=0.830$ ; France,  $R^2=0.205$ ; Italy,  $R^2=0.634$ ; UK,  $R^2=0.696$ ; USA,  $R^2=0.327$ .

| <b>Germany</b>      |                               |             |                           |                |
|---------------------|-------------------------------|-------------|---------------------------|----------------|
| <b>Predictor</b>    | <b>b (95%CI)</b>              | <b>SE B</b> | <b><math>\beta</math></b> | <b>P value</b> |
| Intercept           | -0.001 (-0.001, -222.0E-6)    | 197.0E-6    |                           | <0.05          |
| ICU admissions      | 4.23E-06 (4.0E-6, 5.0E-6)     | 1.5419E-07  | 0.911                     | <0.001         |
| <b>France</b>       |                               |             |                           |                |
| <b>Predictor</b>    | <b>b (95%CI)</b>              | <b>SE B</b> | <b><math>\beta</math></b> | <b>P value</b> |
| Intercept           | -0.053 (-0.094, -0.011)       | 0.021       |                           | <0.05          |
| Hospital admissions | 8.41E-06 (6.0E-6, 11.0E-6)    | 1.0E-6      | 0.452                     | <0.001         |
| <b>Italy</b>        |                               |             |                           |                |
| <b>Predictor</b>    | <b>b (95%CI)</b>              | <b>SE B</b> | <b><math>\beta</math></b> | <b>P value</b> |
| Intercept           | 424.0E-6 (90.0E-6, 758.0E-6)  | 169.0E-6    |                           | <0.05          |
| ICU admissions      | -2.27E-06 (-3.0E-6, -1.0E-6)  | 4.81E-07    | -1.145                    | <0.001         |
| Hospital admissions | 4.13E-07(3.079E-7, 5.1834E-7) | 5.33E-08    | 1.886                     | <0.001         |
| <b>UK</b>           |                               |             |                           |                |
| <b>Predictor</b>    | <b>b (95%CI)</b>              | <b>SE B</b> | <b><math>\beta</math></b> | <b>P value</b> |
| Intercept           | -0.005 (-0.008, -0.002)       | 0.002       |                           | <0.05          |
| Hospital admissions | 3.28E-06 (3.0E-6, 4.0E-6)     | 1.75E-07    | 0.834                     | <0.001         |
| <b>USA</b>          |                               |             |                           |                |
| <b>Predictor</b>    | <b>b (95%CI)</b>              | <b>SE B</b> | <b><math>\beta</math></b> | <b>P value</b> |
| Intercept           | 459.0E-6 (-0.001, 0.002)      | 0.001       |                           | 0.616          |
| ICU admissions      | 2.19E-06 (2.0E-6, 3.0E-6)     | 2.49E-07    | 0.572                     | <0.001         |

For France, a moderate association was found between the IFR and the ICU admissions ( $r(169)=0.400$ ,  $P<0.001$ ) as well as the hospital admissions ( $r(169)=0.452$ ,  $P<0.001$ ). The correlation coefficients accounted for a medium but statistically significant effect size. The number of hospital admissions was the best predictor ( $R^2=0.205$ ,  $f=0.5$ ) (Table 1). When

1  
2  
3 plotted, the modest prediction strength of the number of the hospital admissions in France  
4 was more evident from 16<sup>th</sup> May and explained the gap between the rapid decrease of the  
5 IFR within a short interval and the gradual normalisation of both ICU and hospital admissions  
6 (Figure 2).  
7  
8  
9

10  
11 Data from Italy showed a strong association between the IFR and ICU ( $r(159)=0.703$ ,  $P<0.001$ )  
12 and the hospital admissions ( $r(159)=0.763$ ,  $P<0.001$ ). The bivariate regression showed the  
13 highest determination coefficient ( $R^2=0.634$ ,  $f=1.3$ ), and both variables were included in the  
14 equation (Table 1). Except for the interval between 4<sup>th</sup> April and 2<sup>nd</sup> May, corresponding with  
15 the peak of the ICU and hospital admissions, all parameters decreased at comparable rates,  
16 consistent with the prediction of the model (Figure 3).  
17  
18  
19  
20  
21  
22

23 Analogous results were found in the UK, with significant correlation of both ICU ( $r(154)=0.843$ ,  
24  $P<0.001$ ) and hospital admissions ( $r(154)=0.834$ ,  $P<0.001$ ) with IFR. The number of hospital  
25 admissions was included in the model and the regression found a good predictive strength  
26 ( $R^2=0.696$ ) and a high effect size ( $f=1.4$ ) (Table 1). When compared with the observed values,  
27 the regression underestimated the IFR until 20<sup>th</sup> April, although the interval corresponded to  
28 the period with the highest number of hospital admissions, after which the curves diverged  
29 again, as the fatality rates dropped faster than the number of hospitalised individuals.  
30  
31  
32  
33  
34  
35

36 In USA, a moderate but significant association was found for the ICU admissions  
37 ( $r(160)=0.572$ ,  $P<0.001$ ) and a modest one with the hospital admissions ( $r(160)=0.333$ ,  
38  $P<0.001$ ) and the IFR. The number of ICU admissions was included in the regression, but the  
39 strength of the prediction model was relatively low with a moderate effect size ( $R^2=0.327$ ,  
40  $f=0.7$ ) (Table 1). The intercept contribution to the model was not significant and was excluded  
41 from the equation. Notably, the hospital admissions curve revealed a second peak in August  
42 that was not reflected in a significant increase in ICU admissions as was recorded in April, and  
43 instead corresponded with the highest estimated prevalence. This finding opposed the  
44 assumption of a parallel distribution between the numbers of ICU and hospital admissions  
45 generally observed in the previous months. Thus, the regression curve predicted lower fatality  
46 rates until May, and higher values until September. Another notable finding was that the  
47 estimated prevalence continued to increase from March until August and only started  
48 declining gradually towards September (Figure 3).  
49  
50  
51  
52  
53  
54  
55  
56  
57  
58  
59  
60

1  
2  
3 According to our calculations, France recorded the highest fatality rate (May) among all  
4 countries (0.216% vs. 0.204% ,95% CI 0.135 - 0.334), and also the highest ICU daily occupancy  
5 (7,019), followed by UK (April) (0.089% vs. 0.062%, 95%CI 0.049-0.074) and Spain (April)  
6 (0.047%). The highest fatality rates for the USA (0.026% vs. 0.015%, 95% CI 0.014, 0.021),  
7 Germany (0.012% vs. 0.010% , 95% CI 0.010 - 0.013) and Italy (0.006% vs.0.008% , 95% CI -  
8 0.001, 0.012) occurred in April. The fatality rates decreased with more than 90% in all  
9 countries until plateauing around June, with only small fluctuations towards September.  
10  
11  
12  
13  
14  
15

16 The estimates for prevalence showed the highest value in Spain (4.88%) in May, preceded by  
17 Italy (2.76%) in April (Table 2). The largest interval between the first reported cases and the  
18 peak of the prevalence (2.22%) was registered in France. The prevalence had a continuous  
19 decline in Italy (2.76%) and UK (0.05%) throughout the entire period, and in September, UK  
20 had the lowest prevalence (0.01%) among all countries. In USA the prevalence continued to  
21 increase from April (0.02%) until August (0.07%), with a gradual decline in September (0.05%).  
22 From June in Germany and France, and July in Spain (Figure 2) the prevalence curves showed  
23 a gradual upturn with increasing values until September. At the point of upturn, the  
24 prevalence figures had declined in Spain by 76% (to 1.25%), in France by 61% (to 0.88%) and  
25 in Germany by 54% (to 1.16%) compared to the peak. Figures 2 and 3 depict the different  
26 trends of both prevalence and IFR and highlight the changes in their association when  
27 compared with the first and most affected months. All countries experienced a significant  
28 decrease of the fatality rates in May, which remained low from June until September,  
29 regardless of the course of prevalence.  
30  
31  
32  
33  
34  
35  
36  
37  
38  
39  
40  
41  
42  
43  
44  
45  
46  
47  
48  
49  
50  
51  
52  
53  
54  
55  
56  
57  
58  
59  
60

**Table 2.** Summary of the upper and lower values of the estimated Infection Fatality Rate, prevalence, ICU and hospital admissions, and demographic characteristics of each country.

| <b>Germany</b>                                       |         |                   |      | Hospital beds /1000   | 8     | Population                 | 83,783,945  |
|------------------------------------------------------|---------|-------------------|------|-----------------------|-------|----------------------------|-------------|
| <i>Infection Fatality Rate per 10.000 population</i> |         | <i>Prevalence</i> |      | <i>ICU admissions</i> |       | <i>Hospital admissions</i> |             |
| 07/06/2020                                           | 2.17    | 14/06/2020        | 1.16 | 09/08/2020            | 222   | 12/07/2020                 | 252         |
| 19/04/2020                                           | 122.60  | 12/04/2020        | 2.61 | 26/04/2020            | 2,777 | 12/04/2020                 | 5,704       |
| <b>France</b>                                        |         |                   |      | Hospital beds /1000   | 5.98  | Population                 | 65,273,512  |
| <i>Infection Fatality Rate per 10.000 population</i> |         | <i>Prevalence</i> |      | <i>ICU admissions</i> |       | <i>Hospital admissions</i> |             |
| 13/06/2020                                           | 18.65   | 21/03/2020        | 0.61 | 01/08/2020            | 358   | 29/08/2020                 | 4,579       |
| 02/05/2020                                           | 2160.00 | 23/05/2020        | 2.22 | 11/04/2020            | 7,019 | 18/04/2020                 | 31,446      |
| <b>Italy</b>                                         |         |                   |      | Hospital beds /1000   | 3.18  | Population                 | 60,461,828  |
| <i>Infection Fatality Rate per 10.000 population</i> |         | <i>Prevalence</i> |      | <i>ICU admissions</i> |       | <i>Hospital admissions</i> |             |
| 02/09/2020                                           | 2.79    | 19/08/2020        | 0.02 | 06/08/2020            | 42    | 30/07/2020                 | 773         |
| 16/04/2020                                           | 67.31   | 02/04/2020        | 2.76 | 02/04/2020            | 3,976 | 09/04/2020                 | 32,615      |
| <b>UK</b>                                            |         |                   |      | Hospital beds /1000   | 2.54  | Population                 | 67,886,004  |
| <i>Infection Fatality Rate per 10.000 population</i> |         | <i>Prevalence</i> |      | <i>ICU admissions</i> |       | <i>Hospital admissions</i> |             |
| 31/07/2020                                           | 0.58    | 03/04/2020        | 0.01 | 28/08/2020            | 68    | 04/09/2020                 | 447         |
| 03/04/2020                                           | 887.57  | 29/05/2020        | 0.05 | 17/04/2020            | 3,243 | 17/04/2020                 | 19,221      |
| <b>USA</b>                                           |         |                   |      | Hospital beds /1000   | 2.77  | Population                 | 331,002,647 |
| <i>Infection Fatality Rate per 10.000 population</i> |         | <i>Prevalence</i> |      | <i>ICU admissions</i> |       | <i>Hospital admissions</i> |             |
| 17/07/2020                                           | 32.67   | 31/03/2020        | 0.02 | 31/03/2020            | 211   | 31/03/2020                 | 9,480       |
| 14/04/2020                                           | 255.70  | 28/07/2020        | 0.07 | 12/05/2020            | 6,323 | 28/07/2020                 | 59,026      |
| <b>Spain</b>                                         |         |                   |      | Hospital beds /1000   | 2.97  | Population                 | 46,754,783  |
| <i>Infection Fatality Rate per 10.000 population</i> |         | <i>Prevalence</i> |      | <i>ICU admissions</i> |       | <i>Hospital admissions</i> |             |
| 26/07/2020                                           | 2.14    | 05/07/2020        | 1.25 |                       |       |                            |             |
| 19/04/2020                                           | 473.39  | 03/05/2020        | 4.88 |                       |       |                            |             |

## DISCUSSION

This study was aimed at assessing the pattern of change in prevalence and estimated IFR of Covid-19 over time using data from 6 countries as well as establishing a predictive model for fatality based on hospital and ICU admissions. Our findings show that at the peak of the pandemic, the model underestimated IFR based on hospital and ICU admissions, and that the predictive value increased gradually thereafter until September. One plausible explanation here could be the surge of cases at the peak which generally exceeded the capacity to accommodate and treat by the public health services, leading to fatalities outside the hospitals in venues such as residential and nursing homes. Once healthcare capacities were improved, hospital and/ or ICU admissions became much better predictors of IFR, providing a useful tool to foresee outcomes. Our findings also show a reduction in IFR over time across all countries regardless of variations and differences in prevalence, health care systems and Covid-19 management strategies (Figures 2, 3), prompting discussion on possible explanations for the apparent reduced aggressiveness of the virus. Before exploring these further, however, a note needs to be added on the potential confounding effect of Covid-19 test availability on our observation. In the early stages of the pandemic the lack of diagnostic resources and the need to prioritise tests was recognised as one of the major challenges.<sup>(11)</sup> Consequently, testing among the symptomatic individuals prevailed over the detection of asymptomatic cases. The gradual increase in the number of daily tests (Figure 1), enabling testing of asymptomatic/ mildly symptomatic patients can lead to underestimation of the IFR. To address this, therefore, our data has been adjusted for the number of tests.

### Testing and public health explanations

Since the beginning of the Covid-19 pandemic, laboratories have used the RT-PCR assays as gold standard, but diagnostic development landscape is dynamic and moving rapidly towards antigen rapid detection tests(Ag-RDT).<sup>(12)</sup> Sero-epidemiological surveys are now widely used to quantify the extent of SARS-CoV-2 transmission in the population. Many of these studies are small or based on non-random sampling of participants and thus cannot provide precise

1  
2  
3 estimates for the general population. Multiple surveys worldwide are currently ongoing,  
4 however preliminary data has been made available with seroprevalence estimates for various  
5 countries.(15-17) As previously mentioned, the detection of asymptomatic SARS-CoV-2  
6 infections might explain the apparent reduced pathogenicity of Covid-19. Several studies  
7 estimated a third of all infected individuals to be asymptomatic. A meta-analysis which  
8 included prediction models put the percentage of asymptomatic cases at 9.2% - 69%.(13) In  
9 our study, however, the pattern of reduced IFR regardless of prevalence over time was  
10 maintained even when data were adjusted for the increased number of tests.  
11  
12  
13  
14  
15  
16  
17  
18  
19  
20

21 In terms of public health measures, the first preventive steps were taken early in March, with  
22 a rapid progression towards national lockdown by the end of the month. A systematic review  
23 which included data from previous SARS-CoV-1 and MERS-CoV outbreaks, concluded that  
24 despite the limited evidence in favour of quarantine to control SARS-CoV-2, the available  
25 studies supported the benefits of public health measures.(14) In Europe, the lockdown did  
26 impact the viral transmission rate, and this was reflected in the general decline in the number  
27 of new cases and deaths, as well as the number of hospitalised individuals. The governmental  
28 strategies varied between countries, with high stringency levels generally maintained in USA  
29 and the UK , while others adopted a more permissive policy from May.(1) Despite the  
30 variations in the public health policy and patterns of prevalence, the IFR has continued to  
31 remain low thereafter. Therefore, the theory that slowing the spread of COVID-19 reduces  
32 the fatality rates by preventing hospitals from being overrun and thus allowing better and  
33 lifesaving care would not solely explain the persistence of low mortality rates.  
34  
35  
36  
37  
38  
39  
40  
41  
42  
43  
44  
45

46 The demographic characteristics of the affected population are also relevant and have been  
47 constantly changing, with a shift towards an increased incidence among the younger age  
48 groups. In France, this has been observed from July, with the highest incidence corresponding  
49 to 15 to 44-year olds. In Spain, the median age in July was 44, 38 in August and 39 in  
50 September. In Germany, the median age in July was 36, 32 in August with a slight increase to  
51 35 in September. The median age in Italy decreased from 40 in July to 28 in August, and 40  
52 towards September. In USA, the median age declined from 46 in May to 37 in July and 38 in  
53 August. In the UK, case positivity was the highest amongst older age groups until September;  
54  
55  
56  
57  
58  
59  
60

1  
2  
3 thereafter the highest incidence was seen among individuals aged 15-44 years old. In spite of  
4 the increased relative prevalence amongst the younger age groups, overall since July, the  
5 prevalence has been increasing in all age groups without a significant proportional increase in  
6 IFR, suggesting that other factors may also play an important role here.  
7  
8  
9

### 10 11 12 13 14 **Biological explanations** 15

16  
17  
18 The relationship between the viral load and the likelihood of developing the disease has only  
19 been partly explored. As a result of the public health measures such as social distancing or  
20 wearing face masks, the individuals are likely to be exposed to lower viral loads. This may not  
21 decrease the spread of the virus across the affected population but has potentially an impact  
22 on the ability of the immune system to respond and the subsequent disease evolution in the  
23 infected individuals. Currently there is only limited evidence regarding reduced viral loads in  
24 asymptomatic versus symptomatic individuals, as well as reduced seroconversion among the  
25 asymptomatic population,(18,19) to suggest a positive association between viral load and  
26 disease severity.  
27  
28  
29  
30  
31  
32  
33

34  
35  
36 The mechanisms underlying the differences in Covid-19 susceptibility and disease  
37 presentation are currently unknown, although viral and host genetic variants are probable  
38 factors influencing both disease severity and immune response outcomes. Host genetic  
39 variation may result in different susceptibility to SARS-CoV-2. Although this may account for  
40 the broad spectrum of the symptoms and disease severity associated with Covid-19, it cannot  
41 explain the observed improved fatality rates in the population, as the interval required for  
42 human genome mutations to occur is incomparably high ( $10^{-8}$  per site per generation)(20).  
43  
44  
45  
46  
47  
48  
49

50  
51 Alterations in the viral genome are another possible explanation for the apparent reduced  
52 pathogenicity. The single-stranded RNA viruses accumulate mutations at a rate of  $10^{-6}$ - $10^{-4}$   
53 per replication cycle and might result in enhanced abilities to escape the host immune system  
54 or cause increased virulence.(21) The mutation rate in the SARS-CoV-1 genome was estimated  
55 to be  $0.80 - 2.38 \times 10^{-3}$  nucleotides/genome/year, which is in the same order of magnitude as  
56  
57  
58  
59  
60



1  
2  
3 other RNA viruses.(22) For SARS-CoV-2 the mutation rate has been found to be approximately  
4  $6 \times 10^{-4}$  nucleotides/genome/year.(23) The frequency at which the mutations are found in a  
5 viral population is different from the mutation rate, and depends on several other processes  
6 such as natural selection, random genetic drift, host immune responses, and recombination  
7 amongst others.(21) Natural selection acts on individual alleles based on their mutational  
8 fitness effect (MFE). A positive MFE results in fixation of beneficial alleles, whereas deleterious  
9 and lethal alleles are removed from the population by negative selection.(21) The zoonotic  
10 origin of the SARS-CoV-2 implies the filtering of a multitude of viral strains of different  
11 strengths during its transition to a human host, allowing for the least lethal to efficiently  
12 replicate. The rate at which the environment of a virus population changes has been found  
13 to be closely related with the dynamics of the RNA evolution.(25) Thus, a faster changing  
14 environment would prompt rapid evolutionary changes, such as the case of Influenza.  
15  
16  
17  
18  
19  
20  
21  
22  
23  
24  
25  
26  
27

28 The SARS-CoV-2 genome alignment can be considered as broken into a large Open Reading  
29 Frame (ORF) encoding non-structural proteins, E gene (envelope protein), M gene (membrane  
30 protein), S gene (spike protein), and N gene (nucleocapsid protein) that are common to  
31 coronaviruses , and a set of small accessory genes (ORF 3a, 6, 7a, 7b and 8). Among the non-  
32 structural proteins, the Main protease (Mpro) encoded by ORF 1a and 1b, plays an essential  
33 role in controlling the replication, and the RNA-dependent RNA polymerase, (RdRp) catalyses  
34 the replication of RNA.(23,24) A single mutation in the S protein appears to significantly  
35 increase the transmissibility of SARS-CoV-2 , and the strains containing this mutation spread  
36 fast through Europe and the USA; other recurrent mutations were found proximal to a  
37 potential antiviral binding site in the RdRp or in the receptor-binding-domain(RBD) of the S  
38 protein on a strain from India, which might alter the SARS-CoV-2 ACE2 specific receptor  
39 binding affinity and thus viral behaviour.(20) Therefore, continued surveillance for mutations  
40 and understanding their impact on the biology of the virus remain crucial. A recent study  
41 which analysed the single nucleotide polymorphisms(SNPs) of 31,421 SARS-CoV-2 genome  
42 isolates worldwide, found multiple mutations on the COVID-19 RT-PCR diagnostic targets,  
43 including those designated by the US CDC, with the targets of the E gene and RdRP based  
44 primers exhibiting fewer mutations than the N gene.(27)  
45  
46  
47  
48  
49  
50  
51  
52  
53  
54  
55  
56  
57  
58  
59  
60

1  
2  
3 SARS-CoV-2 as well as SARS-CoV-1 and MERS-CoV all display increased pathogenicity when  
4 compared with the seasonal coronaviruses. A proposed theory that has been investigated for  
5 Dengue virus, HIV, Ebola and other respiratory viruses is the Antibody Dependent  
6 Enhancement (ADE) of the infection, where poorly neutralising antibodies elicited by a  
7 previous contact with the virus facilitate the viral entry resulting in severe forms of  
8 disease.(29) Other studies dispute the cross-reactivity with other coronaviruses, and suggest  
9 the increased pathogenicity as a result of humans' serologically naivety to SARS-CoV-2.(28,29)  
10 Nonetheless, when compared with recent novel virus outbreaks, such as SARS and MERS, the  
11 mortality rate is significantly lower with Covid-19. SARS accounted for 8098 laboratory  
12 confirmed cases between 2002-2004 and 774 deaths, whilst MERS led to 2,494 confirmed  
13 cases and 858 associated deaths in 2012.(30) Similarly, a total of 28,616 Ebola cases were  
14 reported between 2014-2016 with 11,310 deaths.(26) As of 7<sup>th</sup> September, there were  
15 26,763,217 SARS-CoV-2 cases and 876,616 deaths reported worldwide. The overall lower  
16 fatality potential of Covid-19 compared to these other novel viruses combined with its rapid  
17 spread across the world since March, may have provided further evolutionary opportunity in  
18 favour of a less virulent but more infectious virus, manifesting in reduced fatality rates over  
19 time.  
20  
21  
22  
23  
24  
25  
26  
27  
28  
29  
30  
31  
32  
33

34  
35 Covid-19 is a novel virus and there is much to learn about its biology and behaviour. Since  
36 early 2020, the virus has spread fast with catastrophic loss of life and impact on the society.  
37 Nonetheless our data shows a gradual but significant reduction in the virus-related mortality  
38 over time which is difficult to wholly explain by public health measures. Understanding the  
39 basic biology of the virus and how it interacts with host's immune system and leveraging that  
40 knowledge might ultimately hold the key to defeating this disease. Till then our results show  
41 the hospital and ICU admission rates to be useful predictors of patient outcomes and could  
42 be used as early warning signs for escalation of public health measures.  
43  
44  
45  
46  
47  
48  
49

### 50 **Figure legend**

51  
52  
53 Figure 1. Monthly test rate changes for all countries, expressed in percentages from the maximum  
54 recorded value.

55  
56 Figure 2. Weekly distribution of the estimated prevalence and the Infection Fatality Rate (IFR, observed  
57 and predicted) for Germany, France and Spain. Weekly distribution of ICU and hospital admissions for  
58 Germany and France.  
59  
60

1  
2  
3 Figure 3. Weekly distribution of prevalence and Infection Fatality Rate (IFR, observed and predicted)  
4 for Italy, the UK and USA. Weekly distribution of ICU and hospital admissions in the same order.  
5  
6

7  
8 **Contributors:** MAV organized, executed, wrote and reviewed the study. LF organized, wrote  
9 and reviewed the study. JJ organized, executed and reviewed the study. KA conceived,  
10 organized, supported, wrote and reviewed the study. All authors have seen and approved the  
11 final version of manuscript being submitted. The article is the authors' original work, has not  
12 received prior publications and is not under consideration for publication elsewhere.  
13  
14

15  
16 **Reporting statement:** The manuscript was written following the Strengthening the Reporting  
17 of Observational Studies in Epidemiology (STROBE) checklist.  
18

19  
20 **Funding:** This study received no specific grant from any funding agency in the public,  
21 commercial or not-for-profit sectors.  
22

23  
24 **Conflict of interest:** No disclosures to report.  
25

26  
27 **Disclaimer:** The views of the authors do not necessarily reflect those of the NHS, NIHR or the  
28 Department of Health  
29

30  
31 **Patient and public involvement:** Patients and/or the public were not involved in the design,  
32 or conduct, or reporting, or dissemination plans of this research.  
33

34  
35 **Ethics:** Ethical approval is not required.  
36

37  
38 **Patient consent for publication:** Not required.  
39

40  
41 ORCID iD

42 Maria Alexandra Velicu <https://orcid.org/0000-0002-7461-4094>  
43  
44  
45  
46

## 47 REFERENCES

- 48  
49 1. Bsg.ox.ac.uk. 2020. *World'S First COVID-19 Government Response Tracker Launched Today*. [online] Available  
50 at: <<https://www.bsg.ox.ac.uk/news/worlds-first-covid-19-government-response-tracker-launched-today>>  
51  
52 2. Who.int. 2020. *Coronavirus Disease (COVID-19) Situation Reports*. [online] Available at:  
53 <<https://www.who.int/emergencies/diseases/novel-coronavirus-2019/situation-reports>>  
54  
55 3. Who.int. 2020. *Laboratory Testing Of 2019 Novel Coronavirus (2019-Ncov) In Suspected Human Cases:*  
56 *Interim Guidance, 17 January 2020*. [online] Available at: <<https://apps.who.int/iris/handle/10665/330676>>  
57  
58 4. Who.int. 2020. *Laboratory Testing For Coronavirus Disease (COVID-19) In Suspected Human Cases: Interim*  
59 *Guidance, 19 March 2020*. [online] Apps.who.int. Available at:  
60 <<https://apps.who.int/iris/handle/10665/331501>>

- 1  
2  
3 5. Healthdata.gov. 2020. *COVID-19 Diagnostic Laboratory Testing (PCR Testing) Time Series | Healthdata.Gov.*  
4 [online] Available at: <[https://healthdata.gov/dataset/covid-19-diagnostic-laboratory-testing-pcr-testing-time-](https://healthdata.gov/dataset/covid-19-diagnostic-laboratory-testing-pcr-testing-time-series)  
5 series>  
6
- 7 6. Geodes.santepubliquefrance.fr. 2020. [online] Available at:  
8 <[https://geodes.santepubliquefrance.fr/#c=indicator&f=0&i=sp\\_pos\\_heb.t&s=2020-S38&t=a01&view=map1](https://geodes.santepubliquefrance.fr/#c=indicator&f=0&i=sp_pos_heb.t&s=2020-S38&t=a01&view=map1)>  
9
- 10 7. Johns Hopkins Coronavirus Resource Center. 2020. *Testing - Johns Hopkins Coronavirus Resource Center.*  
11 [online] Available at: <<https://coronavirus.jhu.edu/testing>>  
12
- 13 8. Rki.de. 2020. *RKI - Coronavirus SARS-Cov-2 - Hinweise Zur Testung Von Patienten Auf Infektion Mit Dem*  
14 *Neuartigen Coronavirus SARS-Cov-2.* [online] Available at:  
15 <[https://www.rki.de/DE/Content/InfAZ/N/Neuartiges\\_Coronavirus/Vorl\\_Testung\\_nCoV.html](https://www.rki.de/DE/Content/InfAZ/N/Neuartiges_Coronavirus/Vorl_Testung_nCoV.html)>  
16
- 17 9. Who.int. 2020. *Estimating Mortality From COVID-19.* [online] Available at: <[https://www.who.int/news-](https://www.who.int/news-room/commentaries/detail/estimating-mortality-from-covid-19)  
18 room/commentaries/detail/estimating-mortality-from-covid-19>  
19
- 20 10. Meyerowitz-Katz, G. and Merone, L., 2020. A systematic review and meta-analysis of published research  
21 data on COVID-19 infection-fatality rates. *International Journal of Infectious Diseases,*  
22
- 23 11. Who.int. 2020. *WHO Director-General's Opening Remarks At The Media Briefing On COVID-19 - 15 April*  
24 2020. [online] Available at: <[https://www.who.int/dg/speeches/detail/who-director-general-s-opening-](https://www.who.int/dg/speeches/detail/who-director-general-s-opening-remarks-at-the-media-briefing-on-covid-19---15-april-2020)  
25 remarks-at-the-media-briefing-on-covid-19---15-april-2020>  
26
- 27 12. Who.int. 2020. *Antigen-Detection In The Diagnosis Of SARS-Cov-2 Infection Using Rapid Immunoassays.*  
28 [online] Available at: <[https://www.who.int/publications/i/item/antigen-detection-in-the-diagnosis-of-sars-](https://www.who.int/publications/i/item/antigen-detection-in-the-diagnosis-of-sars-cov-2infection-using-rapid-immunoassays)  
29 cov-2infection-using-rapid-immunoassays>  
30
- 31 13. Kronbichler, A., Kresse, D., Yoon, S. et al. 2020. Asymptomatic patients as a source of COVID-19 infections: A  
32 systematic review and meta-analysis. *International Journal of Infectious Diseases,* 98, pp.180-186.  
33
- 34 14. Nussbaumer-Streit, B., Mayr, V., Dobrescu, A. et al. 2020. Quarantine alone or in combination with other  
35 public health measures to control COVID-19: a rapid review. *Cochrane Database of Systematic Reviews,*  
36
- 37 15. Pollán, M., Pérez-Gómez, B. Pastor-Barriuso, R. et al., 2020. Prevalence of SARS-CoV-2 in Spain (ENE-  
38 COVID): a nationwide, population-based seroepidemiological study. *The Lancet,* 396(10250), pp.535-544.  
39
- 40 16. Rki.de. 2020. *RKI - Coronavirus SARS-Cov-2 - Serologische Untersuchungen Von Blutspenden Auf Antikörper*  
41 *Gegen SARS-Cov-2 (Sebluco-Studie).* [online] Available at:  
42 <[https://www.rki.de/DE/Content/InfAZ/N/Neuartiges\\_Coronavirus/Projekte\\_RKI/SeBluco\\_Zwischenbericht.ht](https://www.rki.de/DE/Content/InfAZ/N/Neuartiges_Coronavirus/Projekte_RKI/SeBluco_Zwischenbericht.html)  
43 ml>  
44
- 45 17. Centers for Disease Control and Prevention. 2020. *Coronavirus Disease 2019 (COVID-19) In The U.S..*  
46 [online] Available at: <<https://covid.cdc.gov/covid-data-tracker/#national-lab>>  
47
- 48 18. Wellinghausen, N., Plonné, D., Voss, M. et al. 2020. SARS-CoV-2-IgG response is different in COVID-19  
49 outpatients and asymptomatic contact persons. *Journal of Clinical Virology,* 130, p.104542.  
50
- 51 19. Zhou, R., Li, F., Chen, F. et al. 2020. Viral dynamics in asymptomatic patients with COVID-19. *International*  
52 *Journal of Infectious Diseases,* 96, pp.288-290.  
53
- 54 20. Ovsyannikova, I., Haralambieva, I., Crooke, S. et al. 2020. The role of host genetics in the immune response  
55 to SARS-CoV-2 and COVID-19 susceptibility and severity. *Immunological Reviews,* 296(1), pp.205-219.  
56
- 57 21. Sanjuán, R. and Domingo-Calap, P., 2016. Mechanisms of viral mutation. *Cellular and Molecular Life*  
58 *Sciences,* 73(23), pp.4433-4448.  
59
- 60 22. Zhao, Z., Li, H., Wu, X., Zhong, et al. 2004. Moderate mutation rate in the SARS coronavirus genome and its  
implications. *BMC Evolutionary Biology,* 4(1), p.21.

- 1  
2  
3 23. van Dorp, L., Acman, M., Richard, D. et al. 2020. Emergence of genomic diversity and recurrent mutations  
4 in SARS-CoV-2. *Infection, Genetics and Evolution*, 83, p.104351.  
5  
6 24. Khan, M., Khan, Z. and Baig, M. et al. 2020. Comparative genome analysis of novel coronavirus (SARS-CoV-2)  
7 from different geographical locations and the effect of mutations on major target proteins: An in silico  
8 insight. *PLOS ONE*, 15(9), p.e0238344.  
9  
10 25. Dolan, P., Whitfield, Z. and Andino, R., 2018. Mapping the Evolutionary Potential of RNA Viruses. *Cell Host*  
11 *& Microbe*, 23(4), pp.435-446.  
12  
13 26. Who.int. 2020. *Ebola Virus Disease*. [online] Available at: <[https://www.who.int/news-room/fact-](https://www.who.int/news-room/fact-sheets/detail/ebola-virus-disease)  
14 [sheets/detail/ebola-virus-disease](https://www.who.int/news-room/fact-sheets/detail/ebola-virus-disease)>  
15  
16 27. Wang, R., Hozumi, Y., Yin, C. et al. 2020. Mutations on COVID-19 diagnostic targets. *Genomics*, 112(6),  
17 pp.5204-5213.  
18  
19 28. Lee, W., Wheatley, A., Kent, S. et al. 2020. Antibody-dependent enhancement and SARS-CoV-2 vaccines and  
20 therapies. *Nature Microbiology*, 5(10), pp.1185-1191.  
21  
22 29. Siracusano, G., Pastori, C. and Lopalco, L., 2020. Humoral Immune Responses in COVID-19 Patients: A  
23 Window on the State of the Art. *Frontiers in Immunology*, 11.  
24  
25 30. Hu, T., Liu, Y., Zhao, M. et al. 2020. A comparison of COVID-19, SARS and MERS. *PeerJ*, 8, p.e9725.  
26  
27  
28  
29  
30  
31  
32  
33  
34  
35  
36  
37  
38  
39  
40  
41  
42  
43  
44  
45  
46  
47  
48  
49  
50  
51  
52  
53  
54  
55  
56  
57  
58  
59  
60

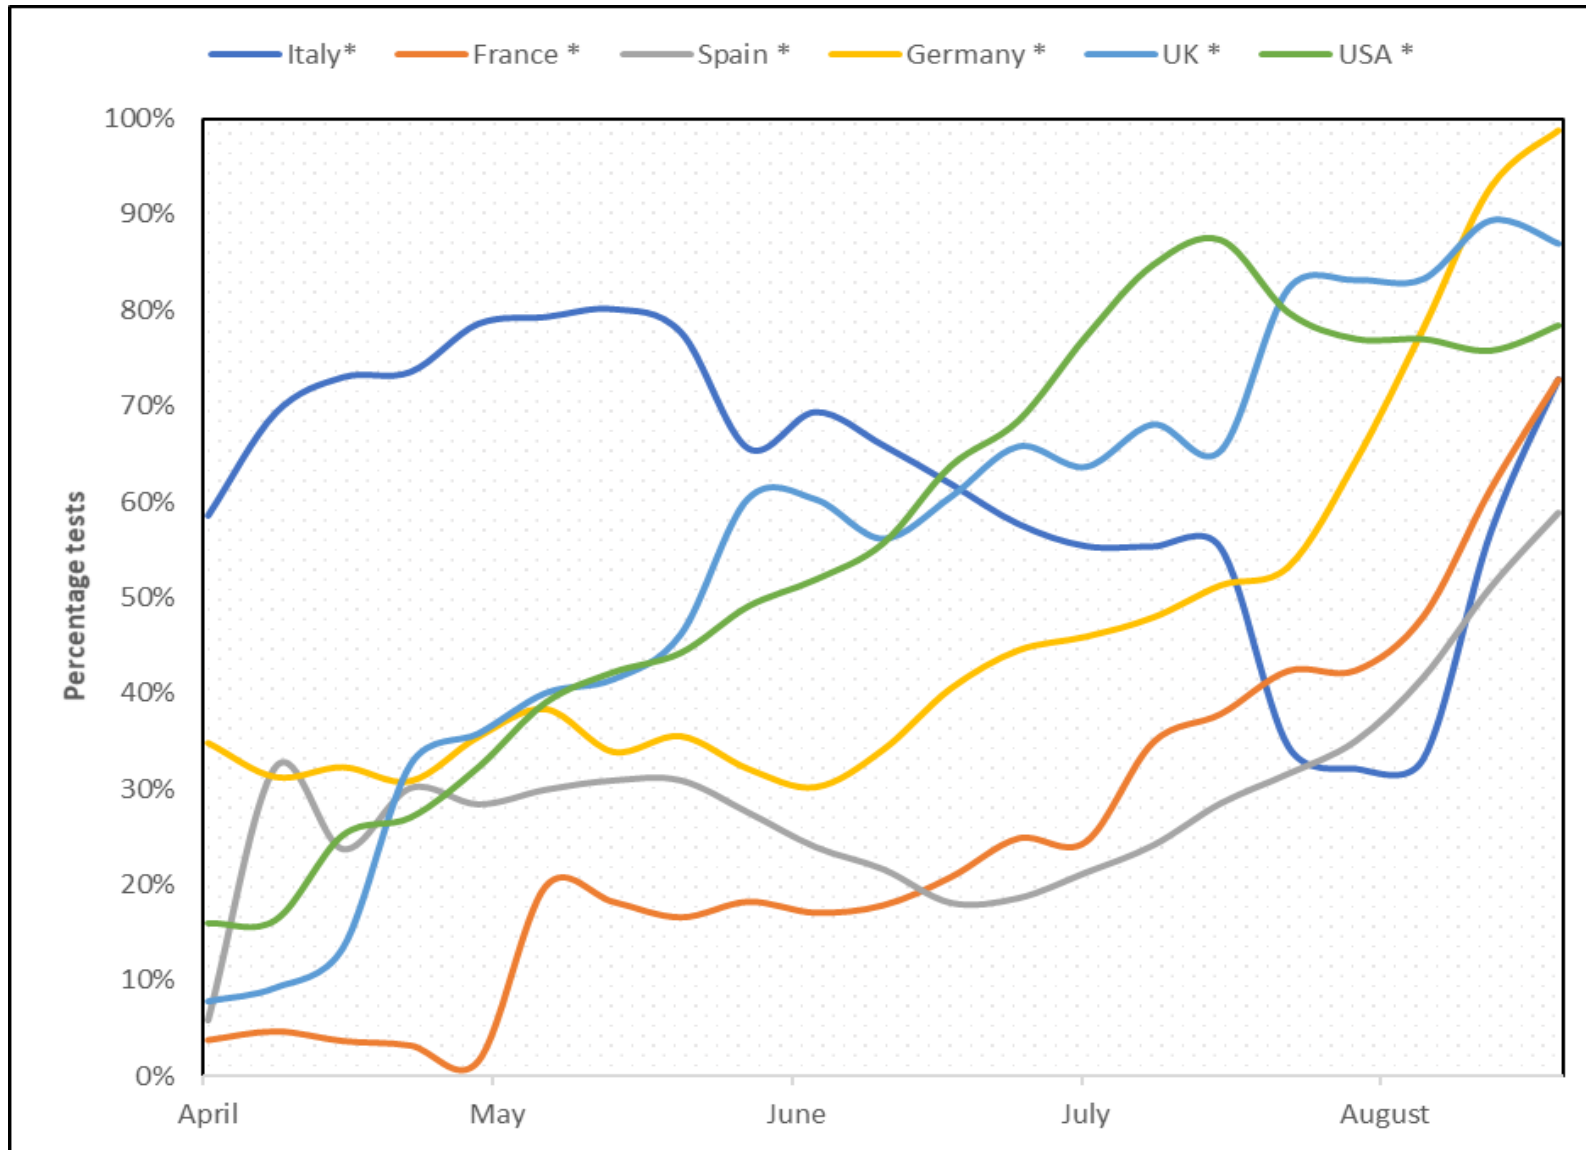

Figure 1. Monthly test rate changes for all countries, expressed in percentages from the maximum recorded value.

1  
2  
3  
4  
5  
6  
7  
8  
9  
10  
11  
12  
13  
14  
15  
16  
17  
18  
19  
20  
21  
22  
23  
24  
25  
26  
27  
28  
29  
30  
31  
32  
33  
34  
35  
36  
37  
38  
39  
40  
41

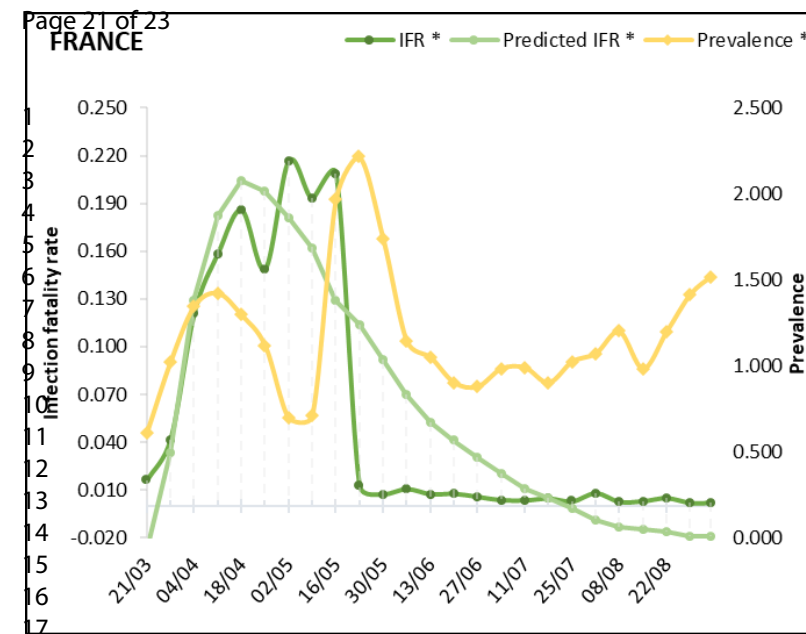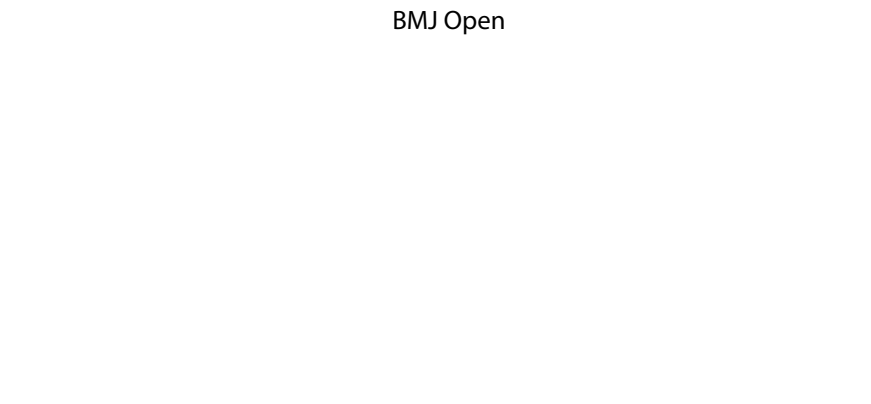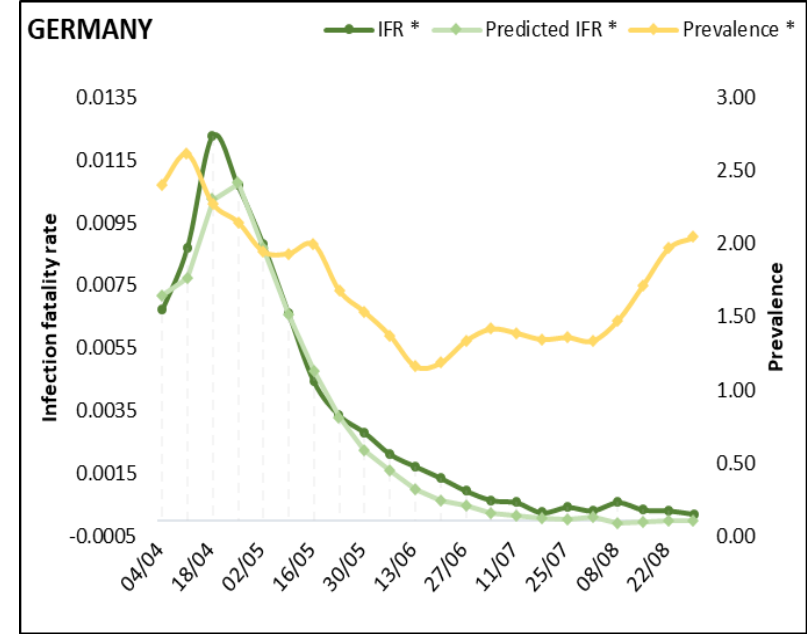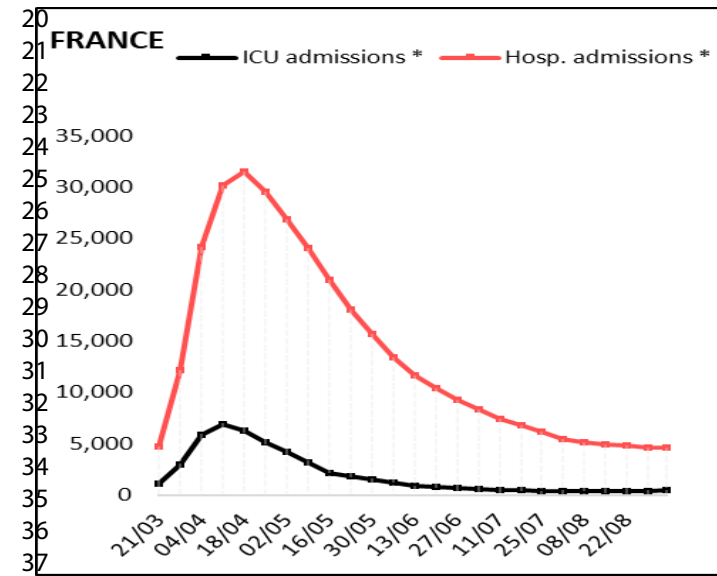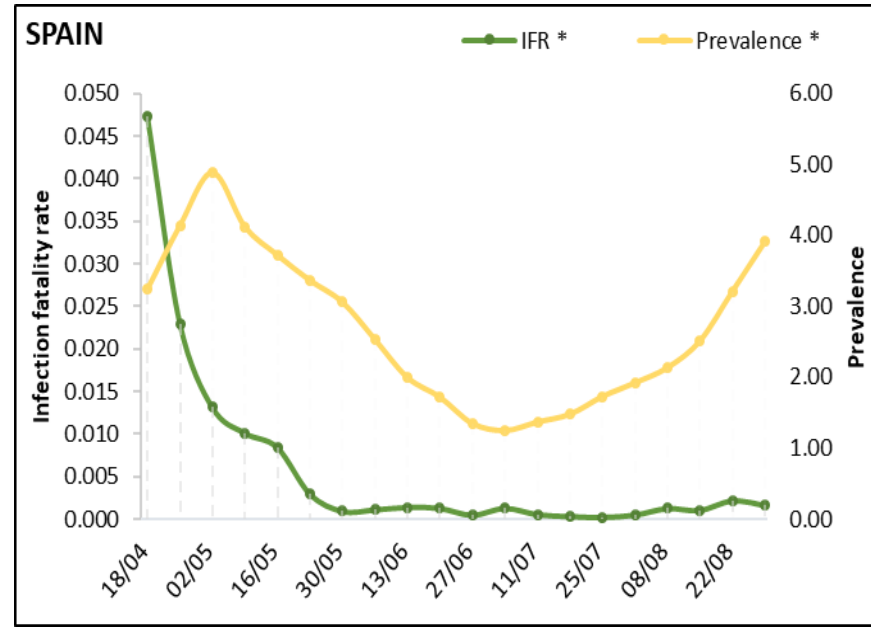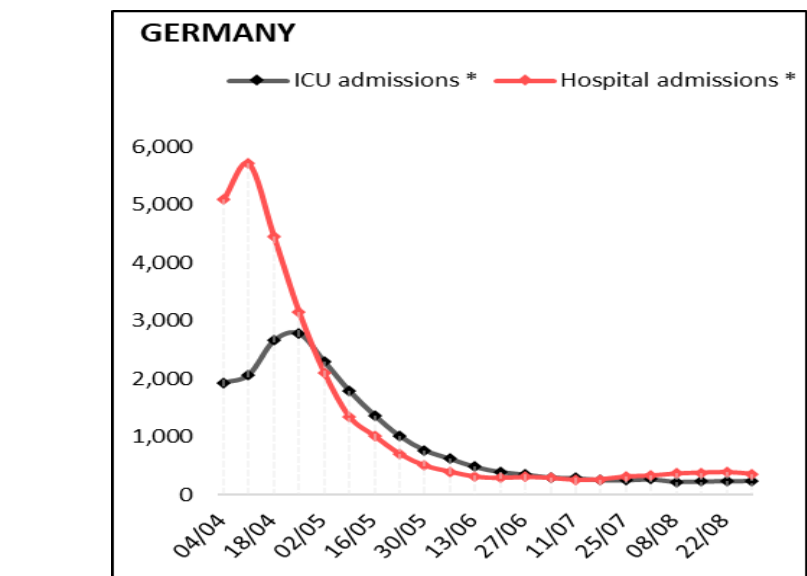

Figure 2. Weekly distribution of the estimated prevalence and the infection fatality rate (IFR, observed and predicted) for Germany, France and Spain. Weekly distribution of the ICU and hospital admissions for Germany and France.

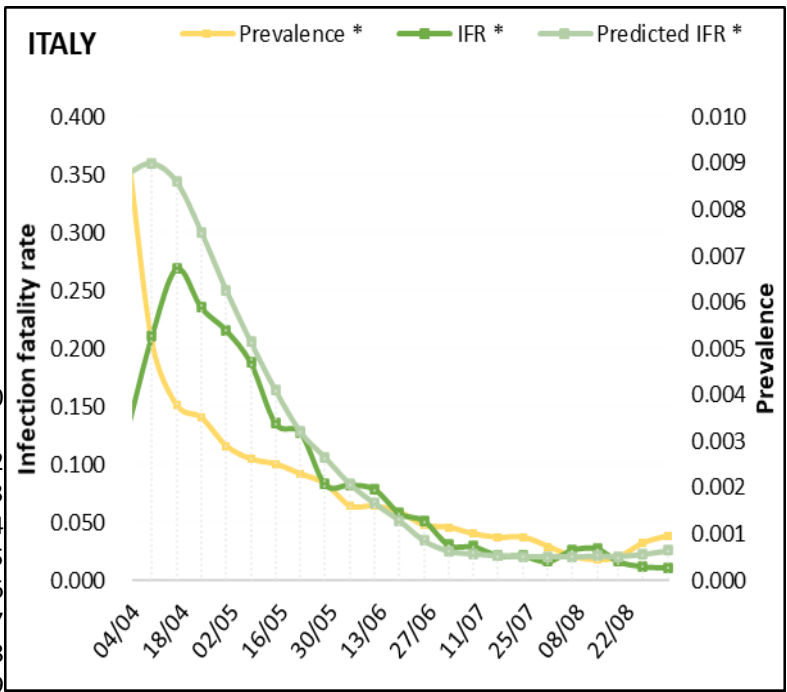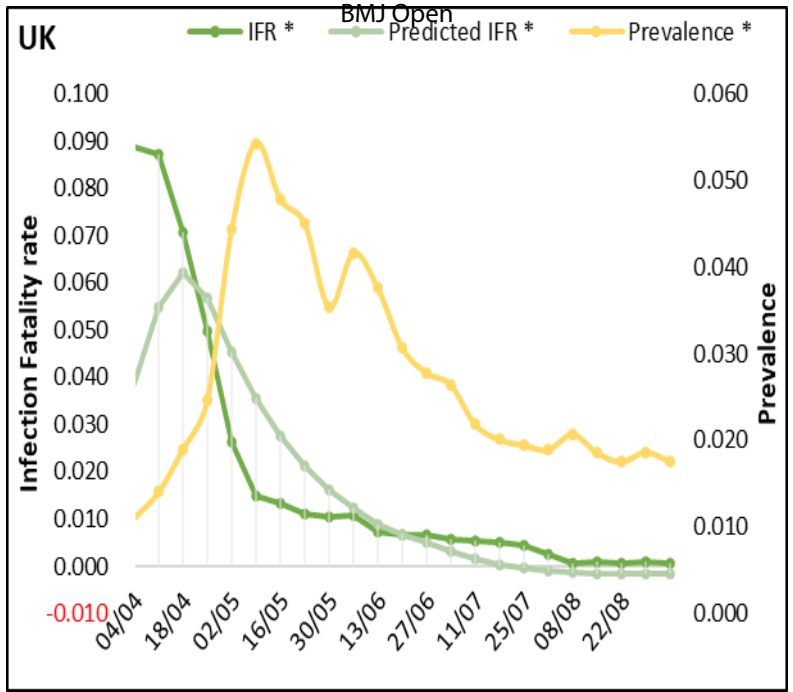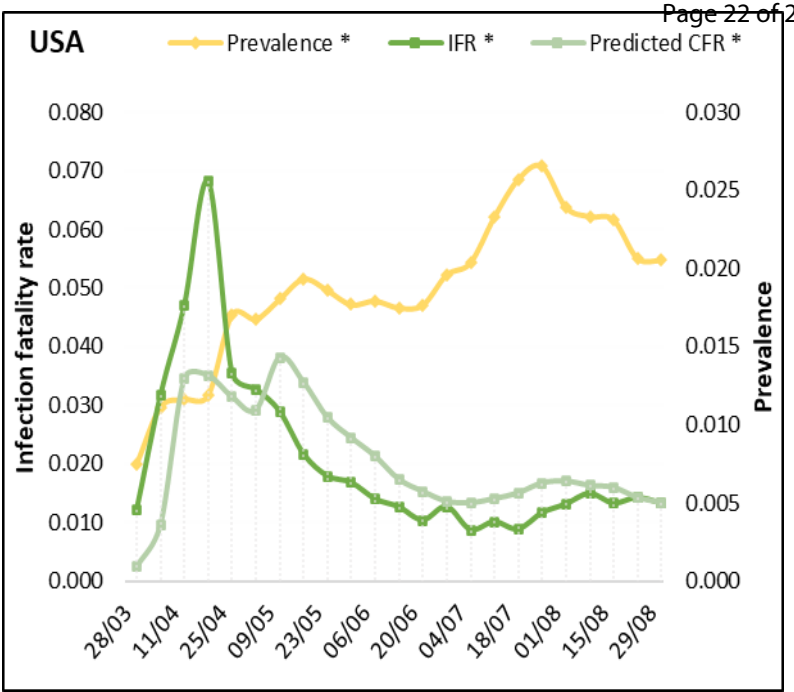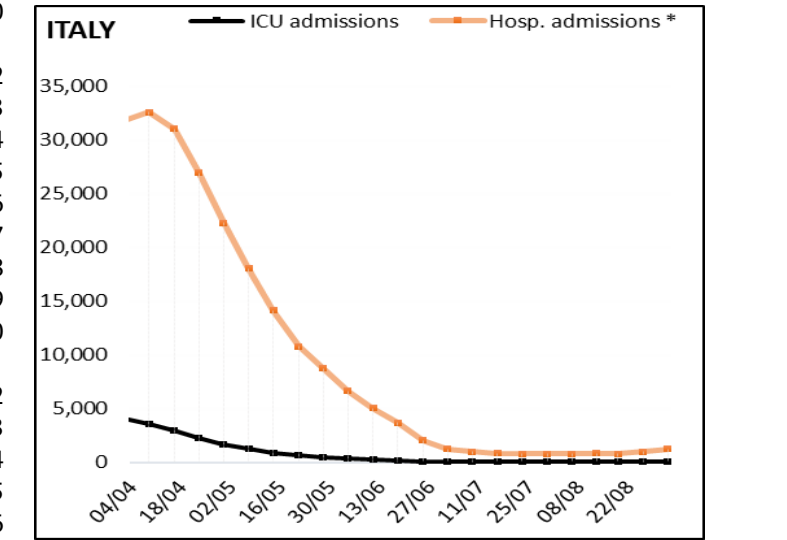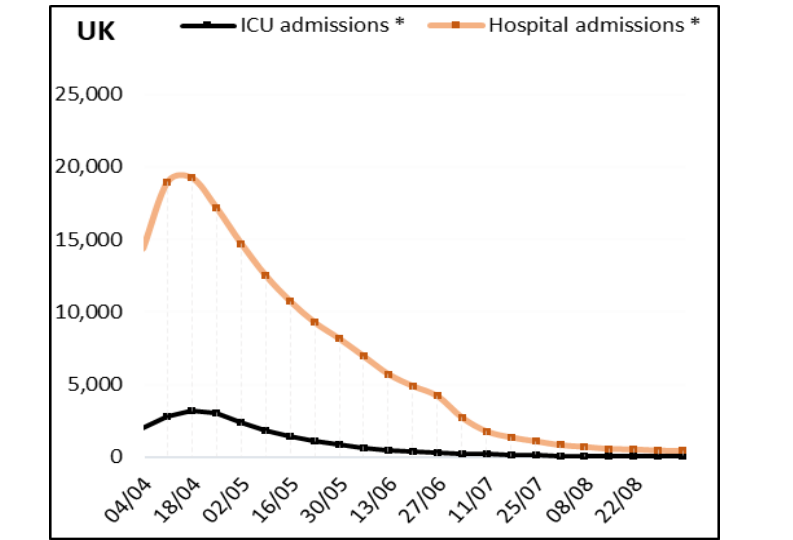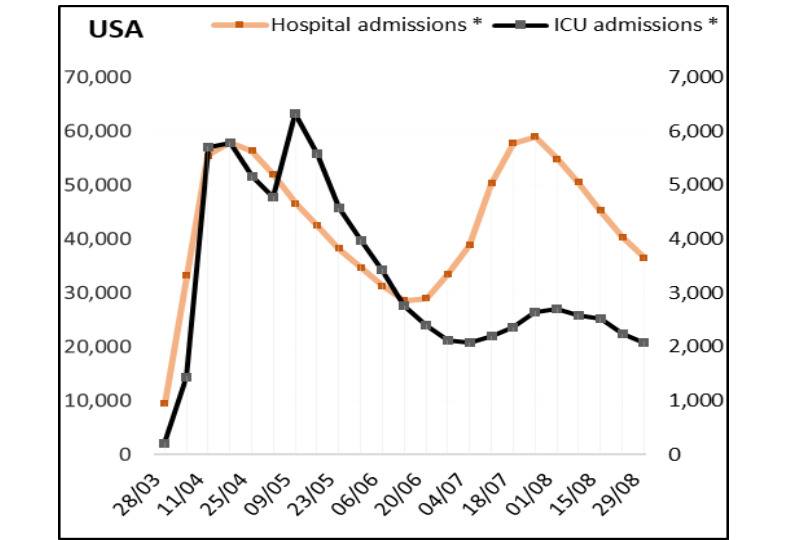

Figure 3. Weekly distribution of prevalence and Infection Fatality Rate (IFR, observed and predicted) for Italy, the UK and USA. Weekly distribution of ICU and hospital admissions in the same order.



STROBE Statement—Checklist of items that should be included in reports of *cohort studies*

|                              | Item No | Recommendation                                                                                                                                                                                                                                                                                                         | Page No       |
|------------------------------|---------|------------------------------------------------------------------------------------------------------------------------------------------------------------------------------------------------------------------------------------------------------------------------------------------------------------------------|---------------|
| <b>Title and abstract</b>    | 1       | (a) Indicate the study's design with a commonly used term in the title or the abstract                                                                                                                                                                                                                                 | 2             |
|                              |         | (b) Provide in the abstract an informative and balanced summary of what was done and what was found                                                                                                                                                                                                                    | 2             |
| <b>Introduction</b>          |         |                                                                                                                                                                                                                                                                                                                        |               |
| Background/rationale         | 2       | Explain the scientific background and rationale for the investigation being reported                                                                                                                                                                                                                                   | 3             |
| Objectives                   | 3       | State specific objectives, including any prespecified hypotheses                                                                                                                                                                                                                                                       | 3             |
| <b>Methods</b>               |         |                                                                                                                                                                                                                                                                                                                        |               |
| Study design                 | 4       | Present key elements of study design early in the paper                                                                                                                                                                                                                                                                | 4             |
| Setting                      | 5       | Describe the setting, locations, and relevant dates, including periods of recruitment, exposure, follow-up, and data collection                                                                                                                                                                                        | 4             |
| Participants                 | 6       | (a) Give the eligibility criteria, and the sources and methods of selection of participants. Describe methods of follow-up<br>(b) For matched studies, give matching criteria and number of exposed and unexposed                                                                                                      | 4             |
| Variables                    | 7       | Clearly define all outcomes, exposures, predictors, potential confounders, and effect modifiers. Give diagnostic criteria, if applicable                                                                                                                                                                               | 5,6           |
| Data sources/<br>measurement | 8*      | For each variable of interest, give sources of data and details of methods of assessment (measurement). Describe comparability of assessment methods if there is more than one group                                                                                                                                   | 4,5           |
| Bias                         | 9       | Describe any efforts to address potential sources of bias                                                                                                                                                                                                                                                              | 5,6           |
| Study size                   | 10      | Explain how the study size was arrived at                                                                                                                                                                                                                                                                              | 3,4           |
| Quantitative variables       | 11      | Explain how quantitative variables were handled in the analyses. If applicable, describe which groupings were chosen and why                                                                                                                                                                                           | 5             |
| Statistical methods          | 12      | (a) Describe all statistical methods, including those used to control for confounding<br>(b) Describe any methods used to examine subgroups and interactions<br>(c) Explain how missing data were addressed<br>(d) If applicable, explain how loss to follow-up was addressed<br>(e) Describe any sensitivity analyses | 6<br>6<br>4,5 |
| <b>Results</b>               |         |                                                                                                                                                                                                                                                                                                                        |               |
| Participants                 | 13*     | (a) Report numbers of individuals at each stage of study—eg numbers potentially eligible, examined for eligibility, confirmed eligible, included in the study, completing follow-up, and analysed<br>(b) Give reasons for non-participation at each stage<br>(c) Consider use of a flow diagram                        |               |
| Descriptive data             | 14*     | (a) Give characteristics of study participants (eg demographic, clinical, social) and information on exposures and potential confounders<br>(b) Indicate number of participants with missing data for each variable of interest<br>(c) Summarise follow-up time (eg, average and total amount)                         |               |
| Outcome data                 | 15*     | Report numbers of outcome events or summary measures over time                                                                                                                                                                                                                                                         | 7,8,9         |

|    |                          |    |                                                                                                                                                                                                              |             |
|----|--------------------------|----|--------------------------------------------------------------------------------------------------------------------------------------------------------------------------------------------------------------|-------------|
| 1  | Main results             | 16 | (a) Give unadjusted estimates and, if applicable, confounder-adjusted estimates and their precision (eg, 95% confidence interval). Make clear which confounders were adjusted for and why they were included | 7,8,9       |
| 2  |                          |    | (b) Report category boundaries when continuous variables were categorized                                                                                                                                    |             |
| 3  |                          |    | (c) If relevant, consider translating estimates of relative risk into absolute risk for a meaningful time period                                                                                             |             |
| 4  |                          |    |                                                                                                                                                                                                              |             |
| 5  |                          |    |                                                                                                                                                                                                              |             |
| 6  |                          |    |                                                                                                                                                                                                              |             |
| 7  |                          |    |                                                                                                                                                                                                              |             |
| 8  |                          |    |                                                                                                                                                                                                              |             |
| 9  | Other analyses           | 17 | Report other analyses done—eg analyses of subgroups and interactions, and sensitivity analyses                                                                                                               | 9           |
| 10 |                          |    |                                                                                                                                                                                                              |             |
| 11 | <b>Discussion</b>        |    |                                                                                                                                                                                                              |             |
| 12 |                          |    |                                                                                                                                                                                                              |             |
| 13 | Key results              | 18 | Summarise key results with reference to study objectives                                                                                                                                                     | 11          |
| 14 | Limitations              | 19 | Discuss limitations of the study, taking into account sources of potential bias or imprecision. Discuss both direction and magnitude of any potential bias                                                   | 11,12,13    |
| 15 |                          |    |                                                                                                                                                                                                              |             |
| 16 | Interpretation           | 20 | Give a cautious overall interpretation of results considering objectives, limitations, multiplicity of analyses, results from similar studies, and other relevant evidence                                   | 12,13,14,15 |
| 17 |                          |    |                                                                                                                                                                                                              |             |
| 18 |                          |    |                                                                                                                                                                                                              |             |
| 19 | Generalisability         | 21 | Discuss the generalisability (external validity) of the study results                                                                                                                                        | 15          |
| 20 |                          |    |                                                                                                                                                                                                              |             |
| 21 | <b>Other information</b> |    |                                                                                                                                                                                                              |             |
| 22 | Funding                  | 22 | Give the source of funding and the role of the funders for the present study and, if applicable, for the original study on which the present article is based                                                | 16          |
| 23 |                          |    |                                                                                                                                                                                                              |             |
| 24 |                          |    |                                                                                                                                                                                                              |             |

\*Give information separately for exposed and unexposed groups.

**Note:** An Explanation and Elaboration article discusses each checklist item and gives methodological background and published examples of transparent reporting. The STROBE checklist is best used in conjunction with this article (freely available on the Web sites of PLoS Medicine at <http://www.plosmedicine.org/>, Annals of Internal Medicine at <http://www.annals.org/>, and Epidemiology at <http://www.epidem.com/>). Information on the STROBE Initiative is available at <http://www.strobe-statement.org>.

# BMJ Open

## Epidemiological trends in Covid-19 pandemic: prospective critical appraisal of observations from six countries in Europe and America

|                                 |                                                                                                                                                                                                                                        |
|---------------------------------|----------------------------------------------------------------------------------------------------------------------------------------------------------------------------------------------------------------------------------------|
| Journal:                        | <i>BMJ Open</i>                                                                                                                                                                                                                        |
| Manuscript ID                   | bmjopen-2020-045782.R1                                                                                                                                                                                                                 |
| Article Type:                   | Original research                                                                                                                                                                                                                      |
| Date Submitted by the Author:   | 22-Feb-2021                                                                                                                                                                                                                            |
| Complete List of Authors:       | Velicu, Maria; King's College London, Neurosurgery<br>Furlanetti, Luciano; King's College Hospital, Neurosurgery<br>Jung, Josephine; King's College Hospital, Neurosurgery<br>Ashkan, Keyoumars; King's College Hospital, Neurosurgery |
| <b>Primary Subject Heading</b>: | Public health                                                                                                                                                                                                                          |
| Secondary Subject Heading:      | Public health, Infectious diseases, Epidemiology, Global health                                                                                                                                                                        |
| Keywords:                       | EPIDEMIOLOGY, COVID-19, International health services < HEALTH SERVICES ADMINISTRATION & MANAGEMENT, Epidemiology < INFECTIOUS DISEASES, Public health < INFECTIOUS DISEASES, Infection control < INFECTIOUS DISEASES                  |
|                                 |                                                                                                                                                                                                                                        |

SCHOLARONE™  
Manuscripts



I, the Submitting Author has the right to grant and does grant on behalf of all authors of the Work (as defined in the below author licence), an exclusive licence and/or a non-exclusive licence for contributions from authors who are: i) UK Crown employees; ii) where BMJ has agreed a CC-BY licence shall apply, and/or iii) in accordance with the terms applicable for US Federal Government officers or employees acting as part of their official duties; on a worldwide, perpetual, irrevocable, royalty-free basis to BMJ Publishing Group Ltd ("BMJ") its licensees and where the relevant Journal is co-owned by BMJ to the co-owners of the Journal, to publish the Work in this journal and any other BMJ products and to exploit all rights, as set out in our [licence](#).

The Submitting Author accepts and understands that any supply made under these terms is made by BMJ to the Submitting Author unless you are acting as an employee on behalf of your employer or a postgraduate student of an affiliated institution which is paying any applicable article publishing charge ("APC") for Open Access articles. Where the Submitting Author wishes to make the Work available on an Open Access basis (and intends to pay the relevant APC), the terms of reuse of such Open Access shall be governed by a Creative Commons licence – details of these licences and which [Creative Commons](#) licence will apply to this Work are set out in our licence referred to above.

Other than as permitted in any relevant BMJ Author's Self Archiving Policies, I confirm this Work has not been accepted for publication elsewhere, is not being considered for publication elsewhere and does not duplicate material already published. I confirm all authors consent to publication of this Work and authorise the granting of this licence.

1  
2  
3 **Epidemiological trends in Covid-19 pandemic: prospective critical appraisal of**  
4 **observations from six countries in Europe and America**  
5  
6  
7  
8

9 Maria Alexandra Velicu, MD, Luciano Furlanetti, MD, PhD, Josephine Jung, MD, PhD,  
10 Keyoumars Ashkan, MD  
11  
12  
13  
14

15 Department of Neurosurgery, King's College Hospital NHS Foundation Trust, London, UK  
16 King's Health Partners Academic Health Sciences Centre, London, UK  
17  
18  
19  
20  
21  
22  
23  
24

25 Running Title: Epidemiological trends in Covid-19 pandemic  
26  
27  
28  
29  
30  
31  
32  
33  
34  
35  
36  
37  
38

39 **Keywords:** COVID-19, SARS-CoV2, Prevalence, Infection Fatality Rate, Epidemiology  
40  
41  
42  
43  
44  
45  
46  
47  
48  
49  
50  
51  
52  
53  
54  
55  
56  
57  
58  
59  
60

**Correspondence:** Maria Alexandra Velicu, MD. Department of Neurosurgery, King's College  
Hospital Foundation Trust, Denmark Hill, London, SE5 9RS. U.K. Tel: +44-(0)203 299 3285.  
Email: [m.velicu@nhs.net](mailto:m.velicu@nhs.net)

Abstract word count: 298

Main manuscript: 4129

Number of references: 37

Number of tables: 2

Number of figures: 3

## ABSTRACT

**Introduction:** Europe was the epicentre of the Coronavirus disease 2019 (Covid-19) pandemic in March 2020, with the highest number of cases and deaths between March and April. In May, the infection numbers registered a fall followed by a second new rise, not proportionally reflected by an increase in the number of deaths. We aimed to investigate the relationship between disease prevalence and infection fatality rate, and the number of intensive care unit (ICU) and hospital admissions over time, to develop a predictive model, as well as appraising the potential contributing factors underpinning this complex relationship.

**Methods:** A prospective epidemiological study using data from six countries collected between 10<sup>th</sup> March and 4<sup>th</sup> September. Data on the number of daily hospital and ICU admissions with Covid-19 were gathered, and the infection fatality rate and the prevalence were calculated. Trends over time were analysed. A linear regression model was used to determine the association between the fatality rates and the number of admissions.

**Findings:** The prediction model confirmed the linear association between the fatality rates and the numbers of ICU and hospital admissions. The exception was during the peak of the Covid-19 pandemic when the model underestimated the fatalities indicating that a substantial number of deaths occurred outside of the hospitals. The fatality rates decreased in all countries from May until September regardless of the trends in prevalence, differences in healthcare systems or strategic variations in handling the pandemic.

**Interpretation:** The observed gradual reduction in Covid-19 fatality rates over time despite varying disease prevalence and public health measures across multiple countries warrants search for a biological explanation. Whilst our understanding of this novel virus grows, hospital and ICU admission rates remain effective predictors of patient outcomes which can be used as early warning signs for escalation of public health measures.

## ARTICLE SUMMARY

### STRENGTHS AND LIMITATIONS OF THIS STUDY

- Comprehensive data on mortality, hospital and ICU admissions were gathered from 6 countries from March to September 2020 on a daily basis
- Our data were verified from multiple sources for each country to ensure accuracy and consistency
- The analysis was adjusted for the number of Covid-19 tests performed to remove the confounding influence of variations in test numbers over time and between countries
- Different countries use different testing technology which may have different diagnostic accuracy

- There were variations in reporting between countries especially when multiple tests were done on the same individual

## INTRODUCTION

Coronavirus disease 2019 (COVID-19) was first reported in Wuhan (Hubei province, China) on 31 December 2019 and has emerged as a new zoonotic infectious disease, leading the World Health Organization (WHO) to declare, in early March, a global health emergency.(1) The SARS-CoV-2 (Severe Acute Respiratory Syndrome Coronavirus-2), which is similar to other previously described coronaviruses, i.e. SARS-CoV-1 (Severe Acute Respiratory Syndrome Coronavirus-1) and MERS-CoV (Middle East Respiratory Syndrome coronavirus), was identified as the pathogenic agent of COVID-19.(1) Initial studies have shown the SARS-CoV-2 to have higher transmissibility, but lower pathogenicity than that of SARS-CoV-1 and MERS-CoV.(1,2) About 81% of the COVID-19 symptomatic patients develop mild symptoms, such as headache, dry cough and fatigue. However, more severe cases can develop respiratory distress, sepsis, severe neurologic symptoms and multi-organ failure.(2) On 13<sup>th</sup> of March 2020, the WHO declared Europe the epicentre of the pandemic with more reported cases and deaths than the rest of the world combined, apart from the People's Republic of China. In Europe, a record number of new cases and deaths caused by Covid-19 occurred between March and beginning of April. This urged most of the European countries to adopt national lockdown measures in March, with the highest stringency levels worldwide.(1) The number of new cases and deaths consequently registered a fall, although by the end of May the distribution of new cases began to rise again. However, the trend in deaths continued downwards, indicating that the increase in cases was not leading to proportional increased mortality.(2)

To better understand these divergent trends, we analysed the data from five of the most severely affected European countries (Spain, Italy, France, Germany, and the United Kingdom). Additionally, we studied data from the USA given the impact of Covid-19 on this country and its significantly different healthcare system from those in Europe. Using the data available, we estimated and compared the distribution of the infection fatality rates (IFR) over time and the prevalence for each country. We included in our study the numbers of intensive

1  
2  
3 care unit (ICU) and hospital admissions and developed a predictive model for outcomes using  
4 these two parameters. We also discussed the potential explanations for the observed trends.  
5  
6  
7  
8  
9

## 10 **METHODS**

### 11 **Search strategy**

12  
13  
14  
15 Data on Covid-19 for each country were acquired from the Statistics and Research Coronavirus  
16 Pandemic section on *Our World in Data* website (3) as the first step. All data were then further  
17 verified with the official publicly available sources: for Spain, from the Spanish Ministry of  
18 Health daily reports,(4) and the Science and Innovation Institute Carlos III,(5) which made  
19 available datasets for public use about the number of tests and both hospital and ICU  
20 admission numbers; for Italy, from the Italian Ministry of Health,(6) with detailed datasets  
21 published by the Presidency of the Council of Ministers - Department of Civil Protection;(7)  
22 for Germany, from data published in the daily epidemiological bulletin from the Robert Koch  
23 Institute;(8) for France, from datasets accessed from the French Public Health website;(9) for  
24 UK, from datasets from the official governmental website;(10) for USA, from the Centre of  
25 Disease Control and Prevention COVID Data Tracker website and US Department of Health  
26 and Human Services. Where contradictory information was found for a given variable,  
27 Ministry of Health or official data were given priority over other sources.  
28  
29  
30  
31  
32  
33  
34  
35  
36  
37  
38  
39

40  
41 The process for Covid-19 case reporting underwent continuous change, and case notifications  
42 developed into more standardised procedures from May, when surveillance platforms, such  
43 as SiViES in Spain, NHS Test and Trace in the UK, SI-DEP in France and the internationally  
44 adopted contact tracing measures were implemented. Consistent data were available from  
45 10<sup>th</sup> March and were collected from this date until 4<sup>th</sup> September 2020. For most countries,  
46 the number of tests refers to the number of Reverse Transcriptase Polymerase Chain Reaction  
47 (RT-PCR) tests performed. The RT-PCR is widely used as the reference standard for the  
48 diagnosis of Covid-19. The WHO published its first guidance on laboratory testing on 17<sup>th</sup>  
49 January(11) and further released a more comprehensive document on 19<sup>th</sup> March.(12)  
50  
51  
52  
53  
54  
55  
56  
57  
58  
59  
60



1  
2  
3 Serological tests have also been used as an alternative or complement to RT-PCR in the  
4 diagnosis of acute infection. In some countries, such as the USA, serological tests have also  
5 been included in the total number of tests,(13) while others have reported their results  
6 separately as in the UK.  
7  
8  
9

10  
11 **Patient and public involvement:** Patients and/or the public were not involved in the design,  
12 or conduct, or reporting, or dissemination plans of this research.  
13  
14

### 15 16 **Data variables**

17  
18 The variables included in our data analysis were the number of Covid-19 cases (new and  
19 cumulative), the number of deaths (new and cumulative), the number of tests (per day and  
20 cumulative), the daily number of confirmed Covid-19 hospitalised individuals, and the daily  
21 number of individuals admitted in the ICU diagnosed with Covid-19. The data collected were  
22 homogenous for each country, except for Spain, where the numbers displayed for ICU and  
23 hospital admissions were cumulative values; therefore, the analysis was performed without  
24 the linear regression.  
25  
26  
27  
28  
29  
30

31  
32 The number of daily tests included in our calculations represent the tests that were reported  
33 during that day. Delays in case notification were up to nine days,(14) and retrospective  
34 corrections were conducted regularly in all countries and amended in the subsequent  
35 epidemiological bulletins.(14–16) The approach for reporting multiple tests done on the same  
36 individual was not uniform for all countries, and detailed information on how this was  
37 addressed was inconsistent; when available, the algorithm consisted of first positive or  
38 negative RT-PCR test being declared if there were similar results, and the first positive test  
39 declared if the results were contradictory.(14) As a result, overestimation of the number of  
40 individuals that were tested in each country can vary.  
41  
42  
43  
44  
45  
46  
47  
48

49  
50 Worldwide testing capacity has improved with time and this was reflected in the daily number  
51 of tests performed. We estimated the prevalence as a proportion of positive individuals from  
52 the total tested, and this was adjusted for the number of tests, as a correction for testing  
53 fluctuations.(Figure 1) Among the measures used to assess the proportion of individuals with  
54 fatal outcomes, infection fatality rate was preferred over the case fatality rate, and was  
55  
56  
57  
58  
59  
60

1  
2  
3 calculated as the proportion of new deaths from the disease out of the estimated number of  
4 infected individuals, based on WHO definition(17):  
5  
6

$$7 \quad \text{Infection fatality rate ( IFR, \%)} = \frac{\text{Number of deaths from disease}}{\text{Number of infected individuals}} \times 100$$

9

10 Multiple methods have been described for the calculation of the IFRs; some studies have  
11 included the RT-PCR positive tests, while others have used the seroprevalence results. A  
12 systematic review of the published data on IFRs concluded that there was a high  
13 heterogeneity among the estimates of IFRs, the calculation of which remains a challenging  
14 task.(18) Also, estimates made on seroprevalence surveys are likely to deliver slightly lower  
15 fatality rates when compared with those that are inferred from other forms of testing.(18) We  
16 have based our calculations on the number of RT-PCR tests given the more consistent  
17 availability of these data across the countries studied.  
18  
19  
20  
21  
22  
23  
24  
25  
26  
27

### 28 **Statistical analysis**

29  
30 Data analysis was carried out using IBM SPSS®. Parametric tests were applied, and Pearson's  
31 correlation calculated to determine the strength of the association between the IFR and the  
32 number of ICU and hospital admissions. The three parameters were examined using a  
33 multivariate linear regression, and an IFR prediction model was developed based on the  
34 results. Sample size was considered adequate to support the regression. A stepwise model  
35 was built for each country, with the regression equation calculated based on the results:  
36  
37  
38  
39  
40  
41

$$42 \quad \text{Infection Fatality Rate} = \text{intercept} + (b_1 \times X) + (b_2 \times Y)$$

43  
44

45 Where the analysis revealed better estimates for univariate regression, the best predictor was  
46 included in the model. If a bivariate regression was calculated, the model was examined for  
47 collinearity. The strength of the association in the model was assessed by calculating the effect  
48 size using *Cohen's f*. The linear regression was not validated in order to preserve the sample  
49 size. The epidemic curves including the course estimate of the IFR (observed and mean of  
50 predicted) and prevalence were plotted, and demographic characteristics were summarised  
51 for each country.  
52  
53  
54  
55  
56  
57  
58  
59  
60

1  
2  
3 A final analysis of data heterogeneity has been performed using the method proposed by  
4 Wang et al. (19) for the determination of spatial stratified heterogeneity( $q$ ) and its probability  
5 density function( $F$ ). The  $q$  statistic has been used as a tool for the assessment of the within  
6 and between countries heterogeneity. Data for each variable has been compared among the  
7 six countries during three consecutive periods corresponding to equally distributed time  
8 intervals from March until September. The variables included in the analysis were the  
9 numbers of daily new tests and deaths, the ICU and hospital admissions, and the IFR and  
10 prevalence.  
11  
12  
13  
14  
15  
16  
17  
18  
19  
20

## 21 RESULTS

22  
23 We developed the regression models based on the estimated values of the IFR and the  
24 prevalence. The fatality rate and the regression mean curves are displayed in Figures 2 and 3  
25 and their trends compared with the estimated prevalence.  
26  
27  
28

29  
30 The analysis for Germany showed a strong positive association with IFR for both ICU  
31 admissions ( $r(157)=0.912$ ,  $P<0.001$ ) and hospital admissions ( $r(154)=0.771$ ,  $P<0.001$ ). The  
32 number of ICU admissions was included as best predictor, and the regression showed the  
33 highest value for the determination coefficient ( $R^2=0.830$ ) with the univariate model. Table 1  
34 summarises the descriptive statistics and analysis results. The high effect size ( $f = 1.7$ ) validates  
35 the linear association between the two variables. The strong prediction model results in the  
36 overlapping of the fatality rate curves during the entire time frame (Figure 2).  
37  
38  
39  
40  
41  
42

43 Table 1. Linear regression analysis for each country, with results of the regression for ICU and/or hospital  
44 admissions. The results were included in the prediction model equation of the IFR.

45 (b, unstandardised beta coefficient; SE, standard error;  $\beta$ , standardised beta coefficient)

46 Note: Germany,  $R^2=0.830$ ; France,  $R^2 =0.205$ ; Italy,  $R^2= 0.634$ ; UK,  $R^2=0.696$ ; USA,  $R^2 =0.327$ .  
47  
48  
49  
50  
51  
52  
53  
54  
55  
56  
57  
58  
59  
60

| <b>Germany</b>      |                               |             |                           |                |
|---------------------|-------------------------------|-------------|---------------------------|----------------|
| <b>Predictor</b>    | <b>b (95%CI)</b>              | <b>SE B</b> | <b><math>\beta</math></b> | <b>P value</b> |
| Intercept           | -0.001 (-0.001, -222.0E-6)    | 197.0E-6    |                           | <0.05          |
| ICU admissions      | 4.23E-06 (4.0E-6, 5.0E-6)     | 1.5419E-07  | 0.911                     | <0.001         |
| <b>France</b>       |                               |             |                           |                |
| <b>Predictor</b>    | <b>b (95%CI)</b>              | <b>SE B</b> | <b><math>\beta</math></b> | <b>P value</b> |
| Intercept           | -0.053 (-0.094, -0.011)       | 0.021       |                           | <0.05          |
| Hospital admissions | 8.41E-06 (6.0E-6, 11.0E-6)    | 1.0E-6      | 0.452                     | <0.001         |
| <b>Italy</b>        |                               |             |                           |                |
| <b>Predictor</b>    | <b>b (95%CI)</b>              | <b>SE B</b> | <b><math>\beta</math></b> | <b>P value</b> |
| Intercept           | 424.0E-6 (90.0E-6, 758.0E-6)  | 169.0E-6    |                           | <0.05          |
| ICU admissions      | -2.27E-06 (-3.0E-6, -1.0E-6)  | 4.81E-07    | -1.145                    | <0.001         |
| Hospital admissions | 4.13E-07(3.079E-7, 5.1834E-7) | 5.33E-08    | 1.886                     | <0.001         |
| <b>UK</b>           |                               |             |                           |                |
| <b>Predictor</b>    | <b>b (95%CI)</b>              | <b>SE B</b> | <b><math>\beta</math></b> | <b>P value</b> |
| Intercept           | -0.005 (-0.008, -0.002)       | 0.002       |                           | <0.05          |
| Hospital admissions | 3.28E-06 (3.0E-6, 4.0E-6)     | 1.75E-07    | 0.834                     | <0.001         |
| <b>USA</b>          |                               |             |                           |                |
| <b>Predictor</b>    | <b>b (95%CI)</b>              | <b>SE B</b> | <b><math>\beta</math></b> | <b>P value</b> |
| Intercept           | 459.0E-6 (-0.001, 0.002)      | 0.001       |                           | 0.616          |
| ICU admissions      | 2.19E-06 (2.0E-6, 3.0E-6)     | 2.49E-07    | 0.572                     | <0.001         |

For France, a moderate association was found between the IFR and the ICU admissions ( $r(169)=0.400$ ,  $P<0.001$ ) as well as the hospital admissions ( $r(169)=0.452$ ,  $P<0.001$ ). The correlation coefficients accounted for a medium but statistically significant effect size. The number of hospital admissions was the best predictor ( $R^2=0.205$ ,  $f=0.5$ ) (Table 1). When plotted, the modest prediction strength of the number of the hospital admissions in France was more evident from 16<sup>th</sup> May and explained the gap between the rapid decrease of the IFR within a short interval and the gradual normalisation of both ICU and hospital admissions (Figure 2).

Data from Italy showed a strong association between the IFR and ICU ( $r(159)=0.703$ ,  $P<0.001$ ) and the hospital admissions ( $r(159)=0.763$ ,  $P<0.001$ ). The bivariate regression showed the highest determination coefficient ( $R^2=0.634$ ,  $f=1.3$ ), and both variables were included in the equation (Table 1). Except for the interval between 4<sup>th</sup> April and 2<sup>nd</sup> May, corresponding with the peak of the ICU and hospital admissions, all parameters decreased at comparable rates, consistent with the prediction of the model (Figure 3).

1  
2  
3 Analogous results were found in the UK, with significant correlation of both ICU ( $r(154)=0.843$ ,  
4  $P<0.001$ ) and hospital admissions ( $r(154)=0.834$ ,  $P<0.001$ ) with IFR. The number of hospital  
5 admissions was included in the model and the regression found a good predictive strength  
6 ( $R^2=0.696$ ) and a high effect size ( $f = 1.4$ ) (Table 1). When compared with the observed values,  
7 the regression underestimated the IFR until 20<sup>th</sup> April, although the interval corresponded to  
8 the period with the highest number of hospital admissions, after which the curves diverged  
9 again, as the fatality rates dropped faster than the number of hospitalised individuals.  
10  
11

12  
13  
14  
15  
16 In USA, a moderate but significant association was found for the ICU admissions  
17 ( $r(160)=0.572$ ,  $P<0.001$ ) and a modest one with the hospital admissions ( $r(160)=0.333$ ,  
18  $P<0.001$ ) and the IFR. The number of ICU admissions was included in the regression, but the  
19 strength of the prediction model was relatively low with a moderate effect size ( $R^2 =0.327$ ,  
20  $f=0.7$ ) (Table 1). The intercept contribution to the model was not significant and was excluded  
21 from the equation. Notably, the hospital admissions curve revealed a second peak in August  
22 that was not reflected in a significant increase in ICU admissions as was recorded in April, and  
23 instead corresponded with the highest estimated prevalence. This finding opposed the  
24 assumption of a parallel distribution between the numbers of ICU and hospital admissions  
25 generally observed in the previous months. Thus, the regression curve predicted lower fatality  
26 rates until May, and higher values until September. Another notable finding was that the  
27 estimated prevalence continued to increase from March until August and only started  
28 declining gradually towards September (Figure 3).  
29  
30  
31  
32  
33  
34  
35  
36  
37  
38  
39  
40

41 According to our calculations, France recorded the highest fatality rate (May) among all  
42 countries (0.216% vs. 0.204% ,95% CI 0.135 - 0.334), and also the highest ICU daily occupancy  
43 (7,019), followed by UK (April) (0.089% vs. 0.062%, 95%CI 0.049 - 0.074) and Spain (April)  
44 (0.047%). The highest fatality rates for the USA (0.026% vs. 0.015%, 95% CI 0.014 - 0.021),  
45 Germany (0.012% vs. 0.010%, 95% CI 0.010 - 0.013) and Italy (0.006% vs.0.008%, 95% CI 0.001  
46 - 0.012) occurred in April. The fatality rates decreased with more than 90% in all countries  
47 until plateauing around June, with only small fluctuations towards September.  
48  
49  
50  
51  
52  
53

54 The estimates for prevalence showed the highest value in Spain (4.88%) in May, preceded by  
55 Italy (2.76%) in April (Table 2). The largest interval between the first reported cases and the  
56 peak of the prevalence (2.22%) was registered in France. The prevalence had a continuous  
57 decline in Italy (2.76%) and UK (0.05%) throughout the entire period, and in September, UK  
58  
59  
60

had the lowest prevalence (0.01%) among all countries. In USA, the prevalence continued to increase from April (0.02%) until August (0.07%), with a gradual decline in September (0.05%). From June in Germany and France, and July in Spain (Figure 2) the prevalence curves showed a gradual upturn with increasing values until September. At the point of upturn, the prevalence figures had declined in Spain by 76% (to 1.25%), in France by 61% (to 0.88%) and in Germany by 54% (to 1.16%) compared to the peak. Figures 2 and 3 depict the different trends of both prevalence and IFR and highlight the changes in their association when compared with the first and most affected months. All countries experienced a significant decrease of the fatality rates in May, which remained low from June until September, regardless of the course of prevalence.

**Table 2.** Summary of the upper and lower values of the estimated Infection Fatality Rate, prevalence, ICU and hospital admissions, and demographic characteristics of each country.

| <b>Germany</b>                                       |         | <b>Hospital beds /1000</b> |      | <b>8</b>              |       | <b>Population</b>          |        | <b>83,783,945</b> |  |
|------------------------------------------------------|---------|----------------------------|------|-----------------------|-------|----------------------------|--------|-------------------|--|
| <i>Infection Fatality Rate per 10.000 population</i> |         | <i>Prevalence</i>          |      | <i>ICU admissions</i> |       | <i>Hospital admissions</i> |        |                   |  |
| 07/06/2020                                           | 2.17    | 14/06/2020                 | 1.16 | 09/08/2020            | 222   | 12/07/2020                 | 252    |                   |  |
| 19/04/2020                                           | 122.60  | 12/04/2020                 | 2.61 | 26/04/2020            | 2,777 | 12/04/2020                 | 5,704  |                   |  |
| <b>France</b>                                        |         | <b>Hospital beds /1000</b> |      | <b>5.98</b>           |       | <b>Population</b>          |        | <b>65,273,512</b> |  |
| <i>Infection Fatality Rate per 10.000 population</i> |         | <i>Prevalence</i>          |      | <i>ICU admissions</i> |       | <i>Hospital admissions</i> |        |                   |  |
| 13/06/2020                                           | 18.65   | 21/03/2020                 | 0.61 | 01/08/2020            | 358   | 29/08/2020                 | 4,579  |                   |  |
| 02/05/2020                                           | 2160.00 | 23/05/2020                 | 2.22 | 11/04/2020            | 7,019 | 18/04/2020                 | 31,446 |                   |  |
| <b>Italy</b>                                         |         | <b>Hospital beds /1000</b> |      | <b>3.18</b>           |       | <b>Population</b>          |        | <b>60,461,828</b> |  |
| <i>Infection Fatality Rate per 10.000 population</i> |         | <i>Prevalence</i>          |      | <i>ICU admissions</i> |       | <i>Hospital admissions</i> |        |                   |  |

|                                                      |        |                   |      |                            |             |                            |                    |
|------------------------------------------------------|--------|-------------------|------|----------------------------|-------------|----------------------------|--------------------|
| 02/09/2020                                           | 2.79   | 19/08/2020        | 0.02 | 06/08/2020                 | 42          | 30/07/2020                 | 773                |
| 16/04/2020                                           | 67.31  | 02/04/2020        | 2.76 | 02/04/2020                 | 3,976       | 09/04/2020                 | 32,615             |
| <b>UK</b>                                            |        |                   |      | <b>Hospital beds /1000</b> | <b>2.54</b> | <b>Population</b>          | <b>67,886,004</b>  |
| <i>Infection Fatality Rate per 10.000 population</i> |        | <i>Prevalence</i> |      | <i>ICU admissions</i>      |             | <i>Hospital admissions</i> |                    |
| 31/07/2020                                           | 0.58   | 03/04/2020        | 0.01 | 28/08/2020                 | 68          | 04/09/2020                 | 447                |
| 03/04/2020                                           | 887.57 | 29/05/2020        | 0.05 | 17/04/2020                 | 3,243       | 17/04/2020                 | 19,221             |
| <b>USA</b>                                           |        |                   |      | <b>Hospital beds /1000</b> | <b>2.77</b> | <b>Population</b>          | <b>331,002,647</b> |
| <i>Infection Fatality Rate per 10.000 population</i> |        | <i>Prevalence</i> |      | <i>ICU admissions</i>      |             | <i>Hospital admissions</i> |                    |
| 17/07/2020                                           | 32.67  | 31/03/2020        | 0.02 | 31/03/2020                 | 211         | 31/03/2020                 | 9,480              |
| 14/04/2020                                           | 255.70 | 28/07/2020        | 0.07 | 12/05/2020                 | 6,323       | 28/07/2020                 | 59,026             |
| <b>Spain</b>                                         |        |                   |      | <b>Hospital beds /1000</b> | <b>2.97</b> | <b>Population</b>          | <b>46,754,783</b>  |
| <i>Infection Fatality Rate per 10.000 population</i> |        | <i>Prevalence</i> |      |                            |             |                            |                    |
| 26/07/2020                                           | 2.14   | 05/07/2020        | 1.25 |                            |             |                            |                    |
| 19/04/2020                                           | 473.39 | 03/05/2020        | 4.88 |                            |             |                            |                    |

When examined for heterogeneity, the analysis has shown that there is significant heterogeneity within the data records of each country and for all variables, with higher q statistic values reflecting the within country and not the between countries heterogeneity for the variable analysed ( $F_{\alpha}$  calculated for  $\alpha=0.05$ ). Overall, the analysis shows an increasing within country heterogeneity of the data towards September for the numbers of daily new deaths, ICU and hospital admissions, whereas for the number of daily tests, prevalence and IFR, the last period shows a trend towards less heterogenous data. The increased q statistic values towards September for the explanatory variables, and decreased for the outcome variables, are in accordance with the maintained low IFR across all countries during the time interval between July and September.

## DISCUSSION

1  
2  
3 This study was aimed at assessing the pattern of change in prevalence and estimated IFR of  
4 Covid-19 over time using data from 6 countries as well as establishing a predictive model for  
5 fatality based on hospital and ICU admissions. Our findings show that at the peak of the  
6 pandemic, the model underestimated IFR based on hospital and ICU admissions, and that the  
7 predictive value increased gradually thereafter until September. One plausible explanation  
8 here could be the surge of cases at the peak which generally exceeded the capacity to  
9 accommodate and treat by the public health services, leading to fatalities outside the  
10 hospitals in venues such as residential and nursing homes. Once healthcare capacities were  
11 improved, hospital and/ or ICU admissions became much better predictors of IFR, providing a  
12 useful tool to foresee outcomes. Our findings also show a reduction in IFR over time across all  
13 countries regardless of variations and differences in prevalence, health care systems and  
14 Covid-19 management strategies (Figures 2, 3), prompting discussion on possible explanations  
15 for the apparent reduced aggressiveness of the virus. Before exploring these further,  
16 however, a note needs to be added on the potential confounding effect of Covid-19 test  
17 availability on our observation. In the early stages of the pandemic the lack of diagnostic  
18 resources and the need to prioritise tests was recognised as one of the major challenges.(20)  
19 Consequently, testing among the symptomatic individuals prevailed over the detection of  
20 asymptomatic cases. The gradual increase in the number of daily tests (Figure 1), enabling  
21 testing of asymptomatic/ mildly symptomatic patients, can lead to underestimation of the IFR.  
22 To address this, therefore, our data has been adjusted for the number of tests.  
23  
24  
25  
26  
27  
28  
29  
30  
31  
32  
33  
34  
35  
36  
37  
38  
39  
40  
41  
42  
43  
44  
45  
46  
47

### Testing and public health explanations

48 Since the beginning of the Covid-19 pandemic, laboratories have used the RT-PCR assays as  
49 gold standard, but diagnostic development landscape is dynamic and moving rapidly towards  
50 antigen rapid detection tests(Ag-RDT).(21) Sero-epidemiological surveys are now widely used  
51 to quantify the extent of SARS-CoV-2 transmission in the population. Many of these studies  
52 are small or based on non-random sampling of participants and thus cannot provide precise  
53 estimates for the general population. Multiple surveys worldwide are currently ongoing,  
54 however preliminary data has been made available with seroprevalence estimates for various  
55  
56  
57  
58  
59  
60



1  
2  
3 countries.(22-24) As previously mentioned, the detection of asymptomatic SARS-CoV-2  
4 infections might explain the apparent reduced pathogenicity of Covid-19. Several studies  
5 estimated a third of all infected individuals to be asymptomatic. A meta-analysis which  
6 included prediction models put the percentage of asymptomatic cases at 9.2% - 69%.(25) In  
7 our study, however, the pattern of reduced IFR regardless of prevalence over time was  
8 maintained even when data were adjusted for the increased number of tests.  
9  
10  
11  
12  
13  
14  
15  
16

17 In terms of public health measures, the first preventive steps were taken early in March, with  
18 a rapid progression towards national lockdown by the end of the month. A systematic review  
19 which included data from previous SARS-CoV-1 and MERS-CoV outbreaks, concluded that  
20 despite the limited evidence in favour of quarantine to control SARS-CoV-2, the available  
21 studies supported the benefits of public health measures.(26) In Europe, the lockdown did  
22 impact the viral transmission rate, and this was reflected in the general decline in the number  
23 of new cases and deaths, as well as the number of hospitalised individuals. The governmental  
24 strategies varied between countries, with high stringency levels generally maintained in USA  
25 and the UK , while others adopted a more permissive policy from May.(1) Despite the  
26 variations in the public health policy and patterns of prevalence, the IFR has continued to  
27 remain low thereafter. Therefore, the theory that slowing the spread of COVID-19 reduces  
28 the fatality rates by preventing hospitals from being overrun and thus allowing better and  
29 lifesaving care would not solely explain the persistence of low mortality rates.  
30  
31  
32  
33  
34  
35  
36  
37  
38  
39  
40  
41  
42

43 The demographic characteristics of the affected population are also relevant and have been  
44 constantly changing, with a shift towards an increased incidence among the younger age  
45 groups. In France, this has been observed from July, with the highest incidence corresponding  
46 to 15- to 44-year-olds. In Spain, the median age in July was 44, 38 in August and 39 in  
47 September. In Germany, the median age in July was 36, 32 in August with a slight increase to  
48 35 in September. The median age in Italy decreased from 40 in July to 28 in August, and 40  
49 towards September. In USA, the median age declined from 46 in May to 37 in July and 38 in  
50 August. In the UK, case positivity was the highest amongst older age groups until September;  
51 thereafter the highest incidence was seen among individuals aged 15-44 years old. In spite of  
52 the increased relative prevalence amongst the younger age groups, overall since July, the  
53  
54  
55  
56  
57  
58  
59  
60

1  
2  
3 prevalence has been increasing in all age groups without a significant proportional increase in  
4 IFR, suggesting that other factors may also play an important role here.  
5  
6  
7  
8  
9

### 10 **Biological explanations**

11  
12  
13  
14 The relationship between the viral load and the likelihood of developing the disease has only  
15 been partly explored. As a result of the public health measures such as social distancing or  
16 wearing face masks, the individuals are likely to be exposed to lower viral loads. This may not  
17 decrease the spread of the virus across the affected population but has potentially an impact  
18 on the ability of the immune system to respond and the subsequent disease evolution in the  
19 infected individuals. Currently there is only limited evidence regarding reduced viral loads in  
20 asymptomatic versus symptomatic individuals, as well as reduced seroconversion among the  
21 asymptomatic population,(27,28) to suggest a positive association between viral load and  
22 disease severity.  
23  
24  
25  
26  
27  
28  
29  
30

31  
32 The mechanisms underlying the differences in Covid-19 susceptibility and disease  
33 presentation are currently unknown, although viral and host genetic variants are probable  
34 factors influencing both disease severity and immune response outcomes. Host genetic  
35 variation may result in different susceptibility to SARS-CoV-2. Although this may account for  
36 the broad spectrum of the symptoms and disease severity associated with Covid-19, it cannot  
37 explain the observed improved fatality rates in the population, as the interval required for  
38 human genome mutations to occur is incomparably high ( $10^{-8}$  per site per generation).(29)  
39  
40  
41  
42  
43  
44  
45  
46  
47

48 Alterations in the viral genome are another possible explanation for the apparent reduced  
49 pathogenicity. The single-stranded RNA viruses accumulate mutations at a rate of  $10^{-6}$ - $10^{-4}$   
50 per replication cycle and might result in enhanced abilities to escape the host immune system  
51 or cause increased virulence.(30) The mutation rate in the SARS-CoV-1 genome was estimated  
52 to be  $0.80 - 2.38 \times 10^{-3}$  nucleotides/genome/year, which is in the same order of magnitude as  
53 other RNA viruses.(31) For SARS-CoV-2 the mutation rate has been found to be approximately  
54  $6 \times 10^{-4}$  nucleotides/genome/year.(32) The frequency at which the mutations are found in a  
55  
56  
57  
58  
59  
60

1  
2  
3 viral population is different from the mutation rate, and depends on several other processes  
4 such as natural selection, random genetic drift, host immune responses, and recombination  
5 amongst others.(30) Natural selection acts on individual alleles based on their mutational  
6 fitness effect (MFE). A positive MFE results in fixation of beneficial alleles, whereas deleterious  
7 and lethal alleles are removed from the population by negative selection.(30) The zoonotic  
8 origin of the SARS-CoV-2 implies the filtering of a multitude of viral strains of different  
9 strengths during its transition to a human host, allowing for the least lethal to efficiently  
10 replicate. The rate at which the environment of a virus population changes has been found  
11 to be closely related with the dynamics of the RNA evolution.(33) Thus, a faster changing  
12 environment would prompt rapid evolutionary changes, such as the case of Influenza. A  
13 recent mutation in the spike protein appears to have significantly increased the  
14 transmissibility of SARS-CoV-2 , and the strains containing this mutation are spreading fast  
15 through Europe and the USA.(29) Therefore, continued surveillance for mutations and  
16 understanding their impact on the biology of the virus remain crucial.  
17  
18  
19  
20  
21  
22  
23  
24  
25  
26  
27  
28  
29  
30  
31

32 SARS-CoV-2 as well as SARS-CoV-1 and MERS-CoV all display increased pathogenicity when  
33 compared with the seasonal coronaviruses. A proposed theory that has been investigated for  
34 Dengue virus, HIV, Ebola and other respiratory viruses is the Antibody Dependent  
35 Enhancement (ADE) of the infection, where poorly neutralising antibodies elicited by a  
36 previous contact with the virus facilitate the viral entry resulting in severe forms of  
37 disease.(34) Other studies dispute the cross-reactivity with other coronaviruses, and suggest  
38 the increased pathogenicity as a result of humans' serologically naivety to SARS-CoV-2.(34,35)  
39 Nonetheless, when compared with recent novel virus outbreaks, such as SARS and MERS, the  
40 mortality rate is significantly lower with Covid-19. SARS accounted for 8098 laboratory  
41 confirmed cases between 2002-2004 and 774 deaths, whilst MERS led to 2,494 confirmed  
42 cases and 858 associated deaths in 2012.(36) Similarly, a total of 28,616 Ebola cases were  
43 reported between 2014-2016 with 11,310 deaths.(37) As of 7<sup>th</sup> September, there were  
44 26,763,217 SARS-CoV-2 cases and 876,616 deaths reported worldwide. The overall lower  
45 fatality potential of Covid-19 compared to these other novel viruses combined with its rapid  
46 spread across the world since March, may have provided further evolutionary opportunity in  
47  
48  
49  
50  
51  
52  
53  
54  
55  
56  
57  
58  
59  
60

1  
2  
3 favour of a less virulent but more infectious virus, manifesting in reduced fatality rates over  
4 time.  
5

### 6 7 **Limitations**

8  
9  
10 One of the main limitations of our study related to the variations in the testing technology  
11 both between different countries and also over time in the same country. Furthermore, the  
12 way test results were reported was not always consistent, especially when multiple tests  
13 were performed in the same individuals. By using data from multiple sources in each  
14 country, we aimed to minimise the effect of these confounding factors.  
15  
16  
17  
18

### 19 20 **Conclusions**

21  
22 Covid-19 is a novel virus and there is much to learn about its biology and behaviour. Since  
23 early 2020, the virus has spread fast with catastrophic loss of life and impact on the society.  
24 Nonetheless our data shows a gradual but significant reduction in the virus-related mortality  
25 over time which is difficult to wholly explain by public health measures. Understanding the  
26 basic biology of the virus and how it interacts with host's immune system and leveraging that  
27 knowledge might ultimately hold the key to defeating this disease. Till then our results show  
28 the hospital and ICU admission rates to be useful predictors of patient outcomes and could  
29 be used as early warning signs for escalation of public health measures.  
30  
31  
32  
33  
34  
35  
36  
37

### 38 39 **Figure legend**

40 Figure 1. Monthly test rate changes for all countries, expressed in percentages from the maximum  
41 recorded value.  
42

43 Figure 2. Weekly distribution of the estimated prevalence and the Infection Fatality Rate (IFR, observed  
44 and predicted) for Germany, France and Spain. Weekly distribution of ICU and hospital admissions for  
45 Germany and France.  
46

47 Figure 3. Weekly distribution of prevalence and Infection Fatality Rate (IFR, observed and predicted)  
48 for Italy, the UK and USA. Weekly distribution of ICU and hospital admissions in the same order.  
49  
50

51 **Contributors:** MAV organized, executed, wrote and reviewed the study. LF organized, wrote  
52 and reviewed the study. JJ organized, executed and reviewed the study. KA conceived,  
53 organized, supported, wrote and reviewed the study. All authors have seen and approved the  
54 final version of manuscript being submitted. The article is the authors' original work, has not  
55 received prior publications and is not under consideration for publication elsewhere.  
56  
57  
58  
59  
60

1  
2  
3 **Reporting statement:** The manuscript was written following the Strengthening the Reporting  
4 of Observational Studies in Epidemiology (STROBE) checklist.  
5

6 **Funding:** This study received no specific grant from any funding agency in the public,  
7 commercial or not-for-profit sectors.  
8  
9

10 **Conflict of interest:** No disclosures to report.  
11  
12

13 **Disclaimer:** The views of the authors do not necessarily reflect those of the NHS, NIHR or the  
14 Department of Health.  
15  
16

17 **Ethics:** Ethical approval is not required.  
18  
19

20 **Patient consent for publication:** Not required.  
21  
22

23 **Data availability statement:** All data relevant to the study are included in the article or  
24 uploaded as supplementary information.  
25  
26

27  
28 ORCID iD

29 Maria Alexandra Velicu <https://orcid.org/0000-0002-7461-4094>  
30  
31  
32  
33

## 34 REFERENCES

- 35  
36  
37 1. Bsg.ox.ac.uk. 2020. *World's First COVID-19 Government Response Tracker Launched Today*. [online] Available  
38 at: <<https://www.bsg.ox.ac.uk/news/worlds-first-covid-19-government-response-tracker-launched-today>>  
39  
40 2. Who.int. 2020. *Coronavirus Disease (COVID-19) Situation Reports*. [online] Available at:  
41 <<https://www.who.int/emergencies/diseases/novel-coronavirus-2019/situation-reports>>  
42  
43 3. *Coronavirus Pandemic (COVID-19)*. [online] Our World in Data. Available at:  
44 <<https://ourworldindata.org/coronavirus>>  
45  
46 4. Mscbs.gob.es. 2021. *Ministerio de Sanidad, Consumo y Bienestar Social - Profesionales - Situación actual*  
47 *Coronavirus*. [online] Available at:  
48 <<https://www.mscbs.gob.es/profesionales/saludPublica/ccayes/alertasActual/nCov/situacionActual.htm>>.  
49  
50 5. Iscii.es. 2021. *Guía COVID-19*. [online] Available at:  
51 <<https://www.iscii.es/QueHacemos/Servicios/Biblioteca/Paginas/Guia-COVID.aspx>> .  
52  
53 6. Salute, M., 2021. *Ministero della Salute*. [online] Salute.gov.it. Available at:  
54 <<http://www.salute.gov.it/portale/home.html>>.  
55  
56 7. Daticovid.it. 2021. *Dati COVID-19 Italia*. [online] Available at: <<https://daticovid.it/>>.  
57  
58 8. Rki.de. 2021. *RKI - Startseite*. [online] Available at: [https://www.rki.de/DE/Home/homepage\\_node.html](https://www.rki.de/DE/Home/homepage_node.html)>.  
59  
60 9. Santepubliquefrance.fr. 2021. *Coronavirus (COVID-19)*. [online] Available at:  
<<http://www.santepubliquefrance.fr/dossiers/coronavirus-covid-19>>.

10. GOV.UK. 2021. *Coronavirus (COVID-19): guidance and support*. [online] Available at: <<https://www.gov.uk/coronavirus>>.
11. Who.int. 2020. *Laboratory Testing Of 2019 Novel Coronavirus (2019-Ncov) In Suspected Human Cases: Interim Guidance, 17 January 2020*. [online] Available at: <<https://apps.who.int/iris/handle/10665/330676>>
12. Who.int. 2020. *Laboratory Testing For Coronavirus Disease (COVID-19) In Suspected Human Cases: Interim Guidance, 19 March 2020*. [online] Apps.who.int. Available at: <<https://apps.who.int/iris/handle/10665/331501>>
13. Healthdata.gov. 2020. *COVID-19 Diagnostic Laboratory Testing (PCR Testing) Time Series | Healthdata.Gov*. [online] Available at: <<https://healthdata.gov/dataset/covid-19-diagnostic-laboratory-testing-pcr-testing-time-series>>
14. Geodes.santepubliquefrance.fr. 2020. [online] Available at: <[https://geodes.santepubliquefrance.fr/#c=indicator&f=0&i=sp\\_pos\\_heb.t&s=2020-S38&t=a01&view=map1](https://geodes.santepubliquefrance.fr/#c=indicator&f=0&i=sp_pos_heb.t&s=2020-S38&t=a01&view=map1)>
15. Johns Hopkins Coronavirus Resource Center. 2020. *Testing - Johns Hopkins Coronavirus Resource Center*. [online] Available at: <<https://coronavirus.jhu.edu/testing>>
16. Rki.de. 2020. *RKI - Coronavirus SARS-Cov-2 - Hinweise Zur Testung Von Patienten Auf Infektion Mit Dem Neuartigen Coronavirus SARS-Cov-2*. [online] Available at: <[https://www.rki.de/DE/Content/InfAZ/N/Neuartiges\\_Coronavirus/Vorl\\_Testung\\_nCoV.html](https://www.rki.de/DE/Content/InfAZ/N/Neuartiges_Coronavirus/Vorl_Testung_nCoV.html)>
17. Who.int. 2020. *Estimating Mortality From COVID-19*. [online] Available at: <<https://www.who.int/news-room/commentaries/detail/estimating-mortality-from-covid-19>>
18. Meyerowitz-Katz, G. and Merone, L., 2020. A systematic review and meta-analysis of published research data on COVID-19 infection fatality rates. *International Journal of Infectious Diseases*, 101, pp.138-148.
19. Wang, J., Zhang, T. and Fu, B., 2016. A measure of spatial stratified heterogeneity. *Ecological Indicators*, 67, pp.250-256.
20. Who.int. 2020. *WHO Director-General's Opening Remarks At The Media Briefing On COVID-19 - 15 April 2020*. [online] Available at: <<https://www.who.int/dg/speeches/detail/who-director-general-s-opening-remarks-at-the-media-briefing-on-covid-19---15-april-2020>>
21. Who.int. 2020. *Antigen-Detection In The Diagnosis Of SARS-Cov-2 Infection Using Rapid Immunoassays*. [online] Available at: <<https://www.who.int/publications/i/item/antigen-detection-in-the-diagnosis-of-sars-cov-2infection-using-rapid-immunoassays>>
22. Pollán, M., Pérez-Gómez, B. Pastor-Barriuso, R. et al., 2020. Prevalence of SARS-CoV-2 in Spain (ENE-COVID): a nationwide, population-based seroepidemiological study. *The Lancet*, 396(10250), pp.535-544.
23. Rki.de. 2020. *RKI - Coronavirus SARS-Cov-2 - Serologische Untersuchungen Von Blutspenden Auf Antikörper Gegen SARS-Cov-2 (Sebluco-Studie)*. [online] Available at: <[https://www.rki.de/DE/Content/InfAZ/N/Neuartiges\\_Coronavirus/Projekte\\_RKI/SeBluCo\\_Zwischenbericht.html](https://www.rki.de/DE/Content/InfAZ/N/Neuartiges_Coronavirus/Projekte_RKI/SeBluCo_Zwischenbericht.html)>
24. Centers for Disease Control and Prevention. 2020. *Coronavirus Disease 2019 (COVID-19) In The U.S*. [online] Available at: <<https://covid.cdc.gov/covid-data-tracker/#national-lab>>
25. Kronbichler, A., Kresse, D., Yoon, S. et al. 2020. Asymptomatic patients as a source of COVID-19 infections: A systematic review and meta-analysis. *International Journal of Infectious Diseases*, 98, pp.180-186.
26. Nussbaumer-Streit, B., Mayr, V., Dobrescu, A. et al. 2020. Quarantine alone or in combination with other public health measures to control COVID-19: a rapid review. *Cochrane Database of Systematic Reviews*.

- 1  
2  
3 27. Wellinghausen, N., Plonné, D., Voss, M. et al. 2020. SARS-CoV-2-IgG response is different in COVID-19  
4 outpatients and asymptomatic contact persons. *Journal of Clinical Virology*, 130, p.104542.  
5  
6 28. Zhou, R., Li, F., Chen, F. et al. 2020. Viral dynamics in asymptomatic patients with COVID-19. *International*  
7 *Journal of Infectious Diseases*, 96, pp.288-290.  
8  
9 29. Ovsyannikova, I., Haralambieva, I., Crooke, S. et al. 2020. The role of host genetics in the immune response  
10 to SARS-CoV-2 and COVID-19 susceptibility and severity. *Immunological Reviews*, 296(1), pp.205-219.  
11  
12 30. Sanjuán, R. and Domingo-Calap, P., 2016. Mechanisms of viral mutation. *Cellular and Molecular Life*  
13 *Sciences*, 73(23), pp.4433-4448.  
14  
15 31. Zhao, Z., Li, H., Wu, X., Zhong, et al. 2004. Moderate mutation rate in the SARS coronavirus genome and its  
16 implications. *BMC Evolutionary Biology*, 4(1), p.21.  
17  
18 32. van Dorp, L., Acman, M., Richard, D. et al. 2020. Emergence of genomic diversity and recurrent mutations  
19 in SARS-CoV-2. *Infection, Genetics and Evolution*, 83, p.104351.  
20  
21 33. Dolan, P., Whitfield, Z. and Andino, R., 2018. Mapping the Evolutionary Potential of RNA Viruses. *Cell Host*  
22 *& Microbe*, 23(4), pp.435-446.  
23  
24 34. Lee, W., Wheatley, A., Kent, S. et al. 2020. Antibody-dependent enhancement and SARS-CoV-2 vaccines and  
25 therapies. *Nature Microbiology*, 5(10), pp.1185-1191.  
26  
27 35. Siracusano, G., Pastori, C. and Lopalco, L., 2020. Humoral Immune Responses in COVID-19 Patients: A  
28 Window on the State of the Art. *Frontiers in Immunology*, 11.  
29  
30 36. Hu, T., Liu, Y., Zhao, M. et al. 2020. A comparison of COVID-19, SARS and MERS. *PeerJ*, 8, p.e9725.  
31  
32 37. Who.int. 2020. *Ebola Virus Disease*. [online] Available at: <<https://www.who.int/news-room/fact-sheets/detail/ebola-virus-disease>>  
33  
34  
35  
36  
37  
38  
39  
40  
41  
42  
43  
44  
45  
46  
47  
48  
49  
50  
51  
52  
53  
54  
55  
56  
57  
58  
59  
60

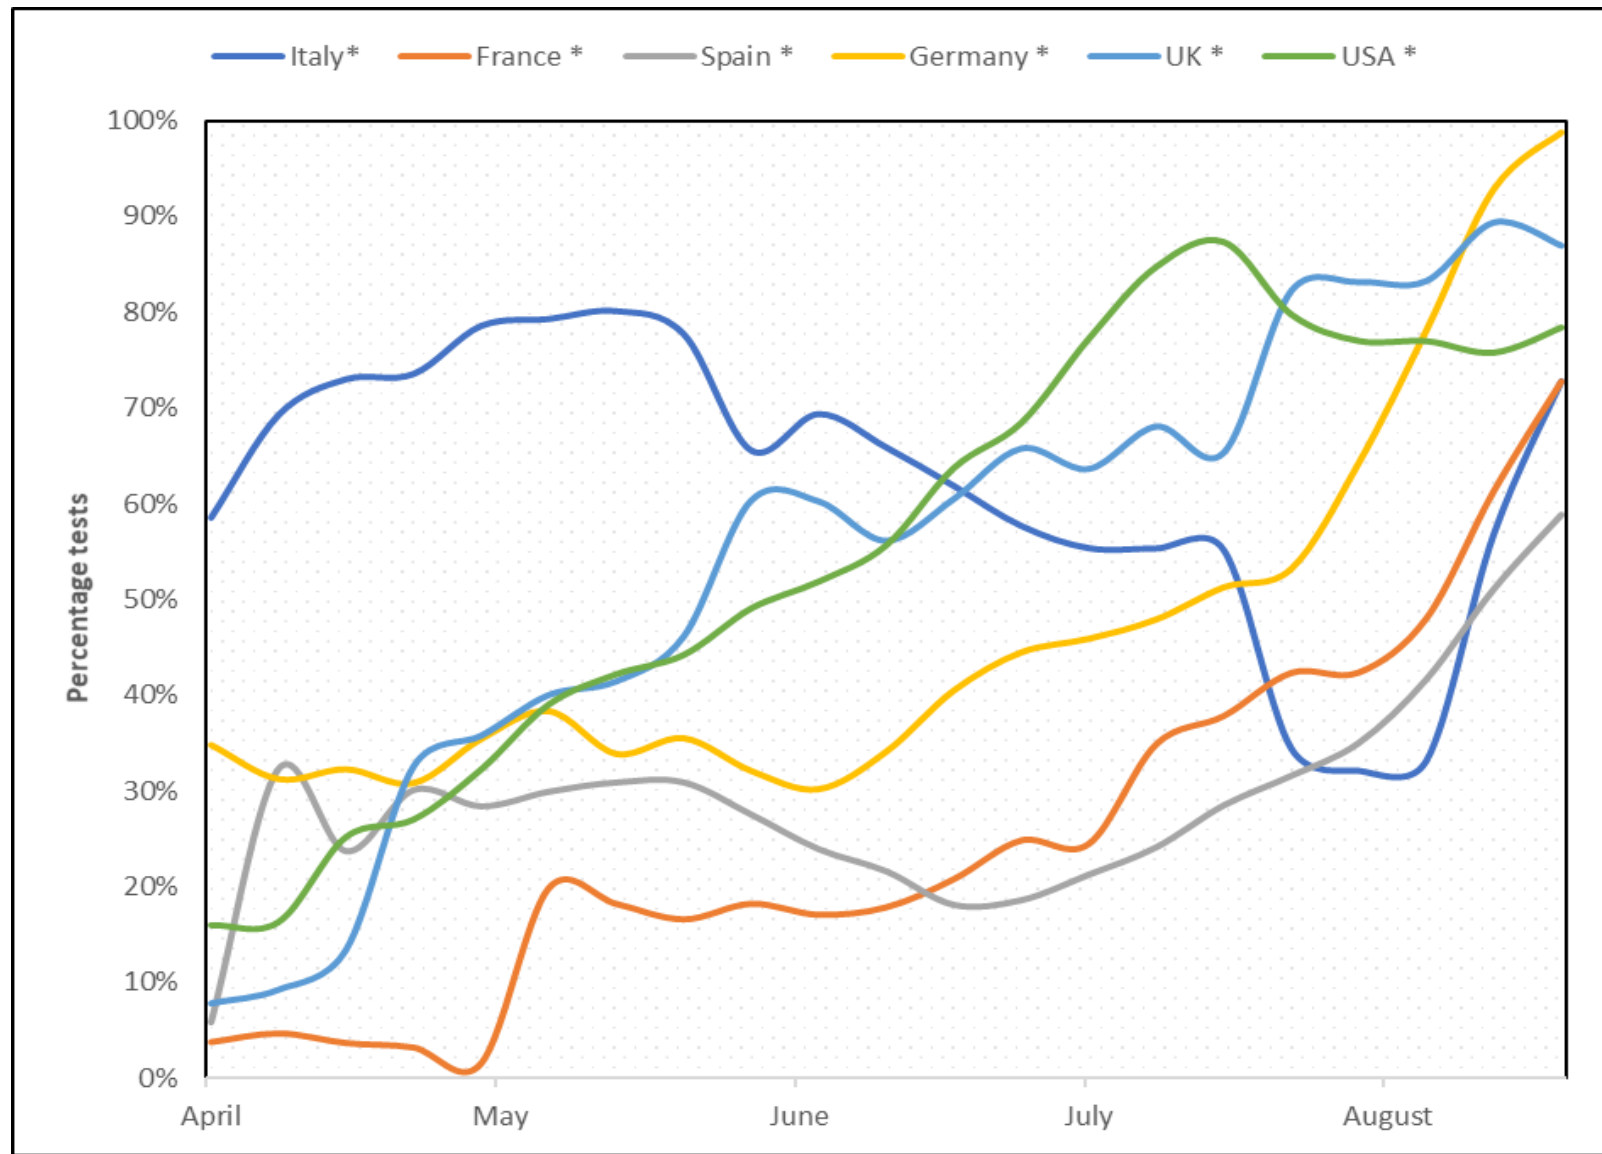

Figure 1. Monthly test rate changes for all countries, expressed in percentages from the maximum recorded value.

1  
2  
3  
4  
5  
6  
7  
8  
9  
10  
11  
12  
13  
14  
15  
16  
17  
18  
19  
20  
21  
22  
23  
24  
25  
26  
27  
28  
29  
30  
31  
32  
33  
34  
35  
36  
37  
38  
39  
40  
41



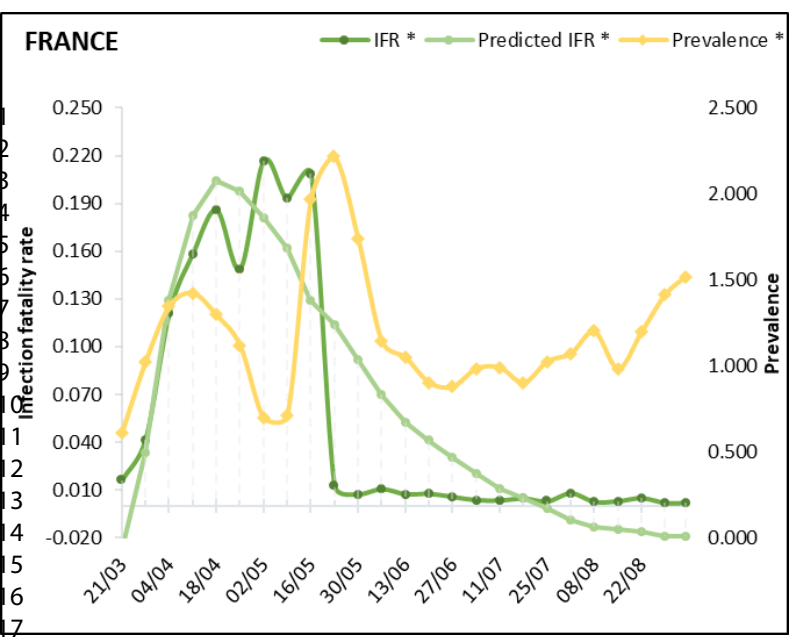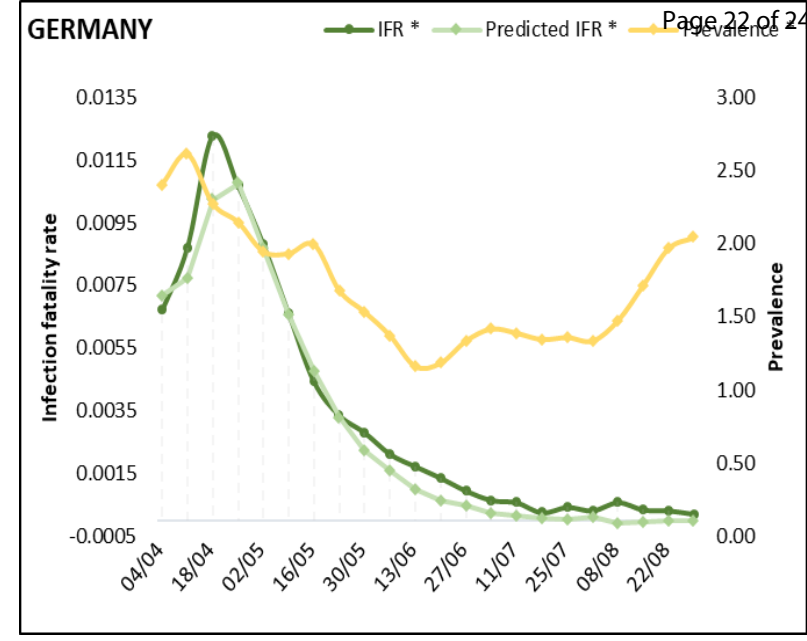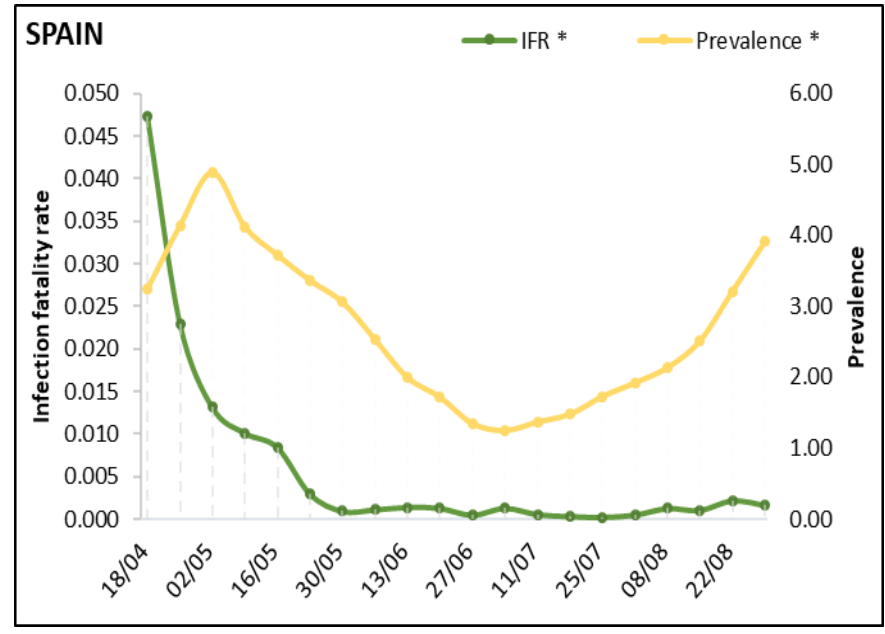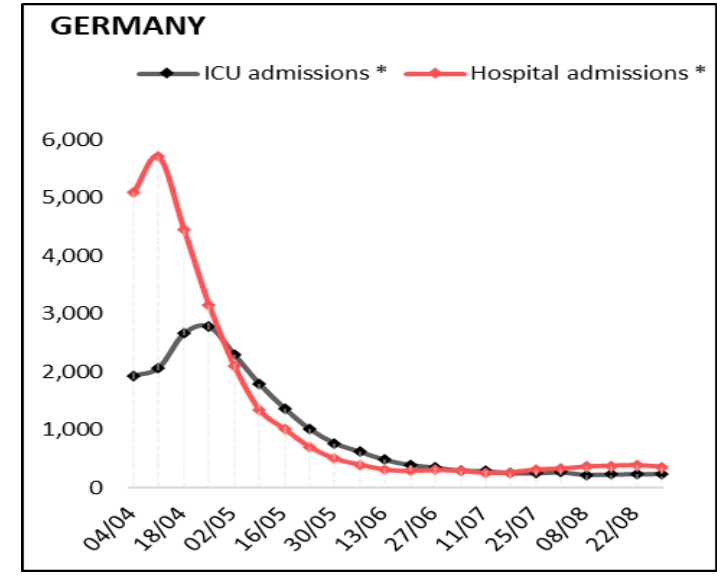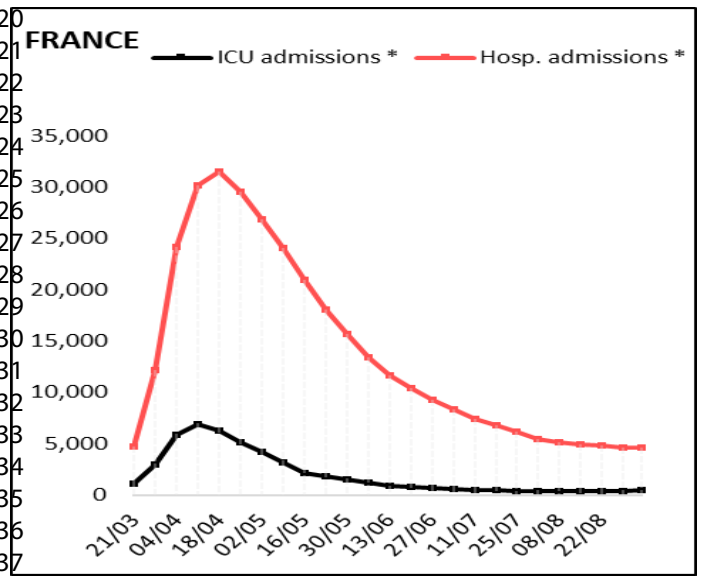

Figure 2. Weekly distribution of the estimated prevalence and the infection fatality rate (IFR, observed and predicted) for Germany, France and Spain. Weekly distribution of the ICU and hospital admissions for Germany and France.

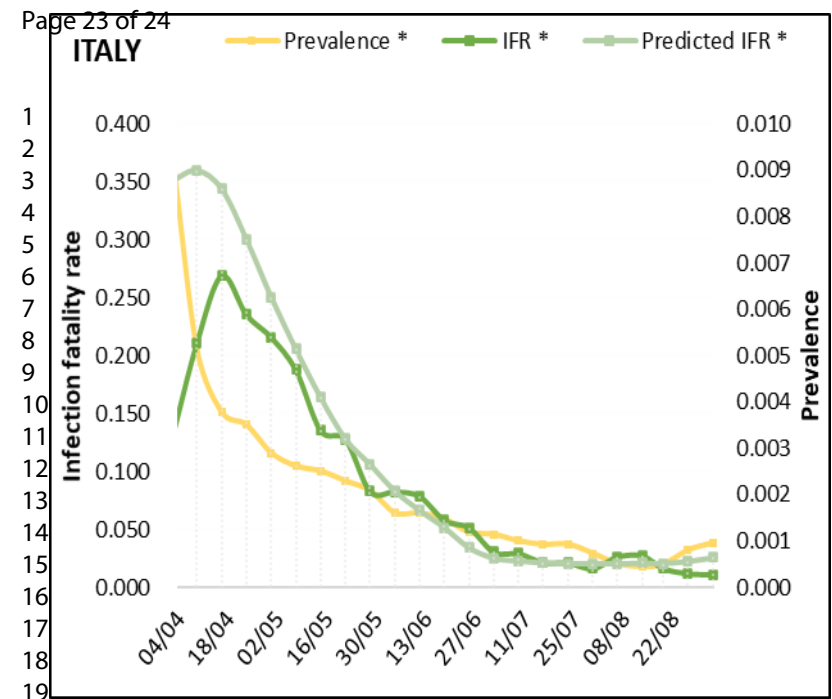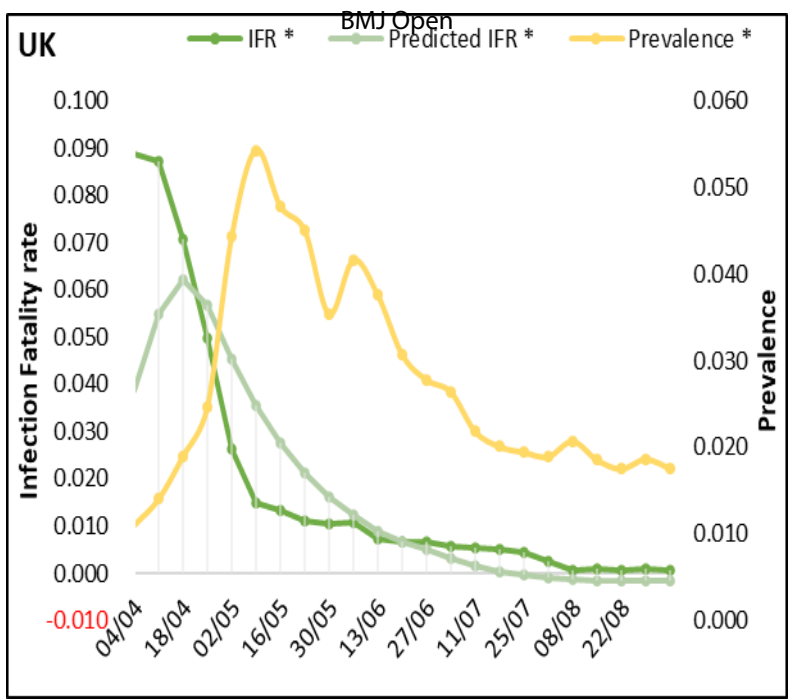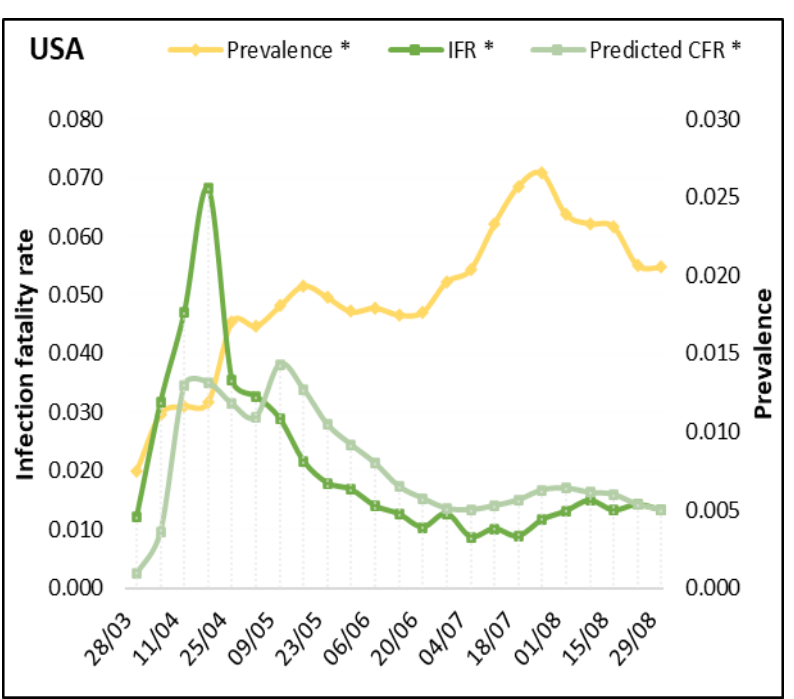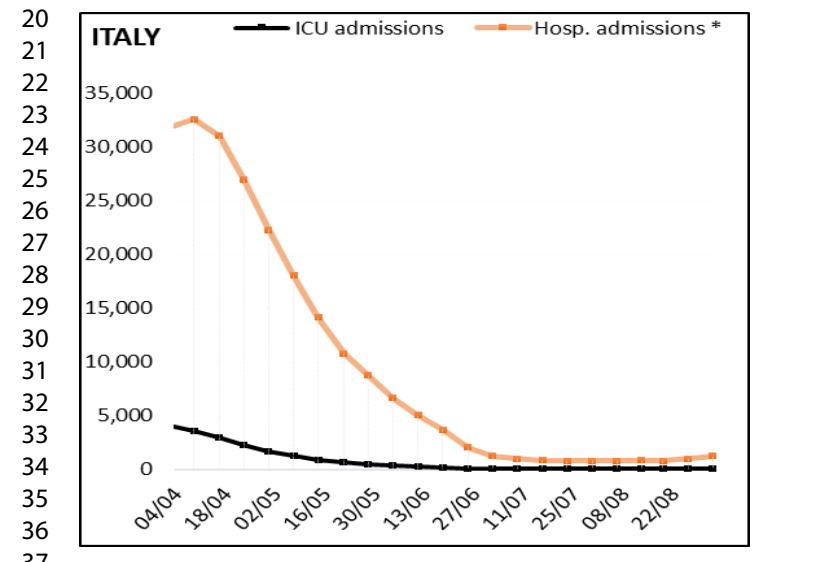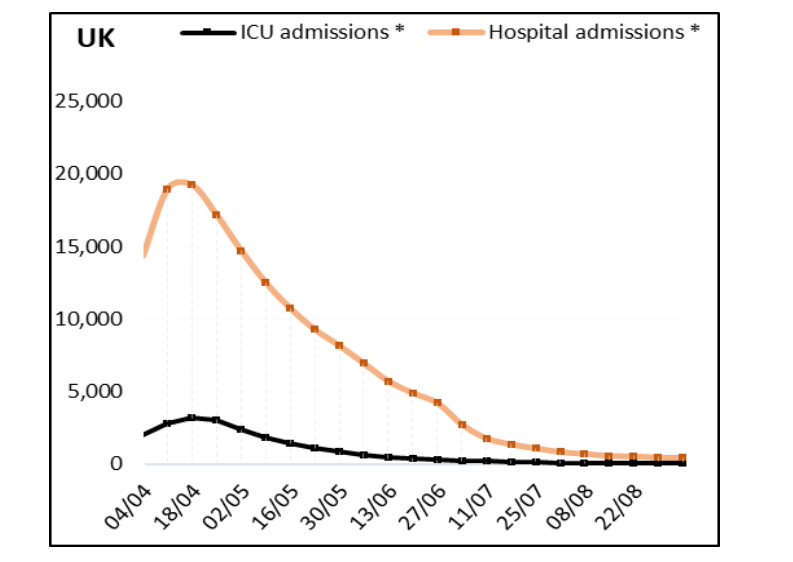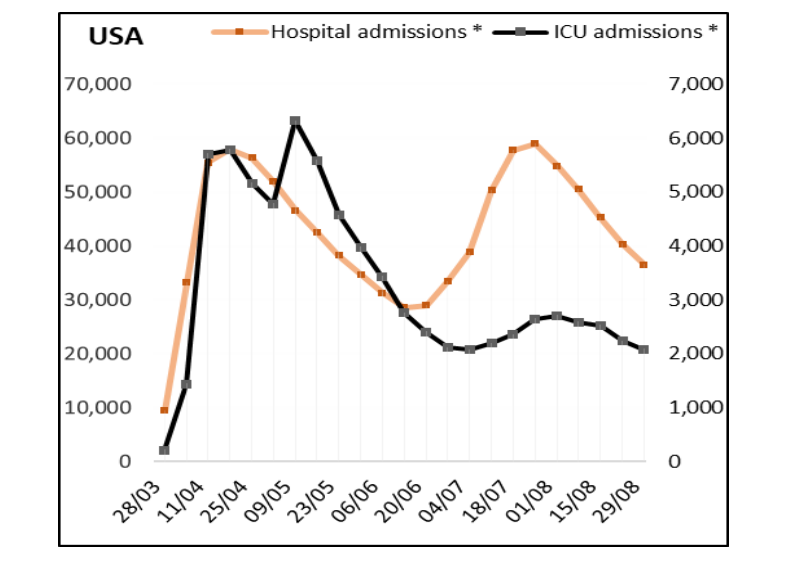

Figure 3. Weekly distribution of prevalence and Infection Fatality Rate (IFR, observed and predicted) for Italy, the UK and USA. Weekly distribution of ICU and hospital admissions in the same order.

STROBE Statement—Checklist of items that should be included in reports of *cohort studies*

|                              | Item No | Recommendation                                                                                                                                                                                                                                                                                                         | Page No       |
|------------------------------|---------|------------------------------------------------------------------------------------------------------------------------------------------------------------------------------------------------------------------------------------------------------------------------------------------------------------------------|---------------|
| <b>Title and abstract</b>    | 1       | (a) Indicate the study's design with a commonly used term in the title or the abstract                                                                                                                                                                                                                                 | 2             |
|                              |         | (b) Provide in the abstract an informative and balanced summary of what was done and what was found                                                                                                                                                                                                                    | 2             |
| <b>Introduction</b>          |         |                                                                                                                                                                                                                                                                                                                        |               |
| Background/rationale         | 2       | Explain the scientific background and rationale for the investigation being reported                                                                                                                                                                                                                                   | 3             |
| Objectives                   | 3       | State specific objectives, including any prespecified hypotheses                                                                                                                                                                                                                                                       | 3             |
| <b>Methods</b>               |         |                                                                                                                                                                                                                                                                                                                        |               |
| Study design                 | 4       | Present key elements of study design early in the paper                                                                                                                                                                                                                                                                | 4             |
| Setting                      | 5       | Describe the setting, locations, and relevant dates, including periods of recruitment, exposure, follow-up, and data collection                                                                                                                                                                                        | 4             |
| Participants                 | 6       | (a) Give the eligibility criteria, and the sources and methods of selection of participants. Describe methods of follow-up<br>(b) For matched studies, give matching criteria and number of exposed and unexposed                                                                                                      | 4             |
| Variables                    | 7       | Clearly define all outcomes, exposures, predictors, potential confounders, and effect modifiers. Give diagnostic criteria, if applicable                                                                                                                                                                               | 5,6           |
| Data sources/<br>measurement | 8*      | For each variable of interest, give sources of data and details of methods of assessment (measurement). Describe comparability of assessment methods if there is more than one group                                                                                                                                   | 4,5           |
| Bias                         | 9       | Describe any efforts to address potential sources of bias                                                                                                                                                                                                                                                              | 5,6           |
| Study size                   | 10      | Explain how the study size was arrived at                                                                                                                                                                                                                                                                              | 3,4           |
| Quantitative variables       | 11      | Explain how quantitative variables were handled in the analyses. If applicable, describe which groupings were chosen and why                                                                                                                                                                                           | 5             |
| Statistical methods          | 12      | (a) Describe all statistical methods, including those used to control for confounding<br>(b) Describe any methods used to examine subgroups and interactions<br>(c) Explain how missing data were addressed<br>(d) If applicable, explain how loss to follow-up was addressed<br>(e) Describe any sensitivity analyses | 6<br>6<br>4,5 |
| <b>Results</b>               |         |                                                                                                                                                                                                                                                                                                                        |               |
| Participants                 | 13*     | (a) Report numbers of individuals at each stage of study—eg numbers potentially eligible, examined for eligibility, confirmed eligible, included in the study, completing follow-up, and analysed<br>(b) Give reasons for non-participation at each stage<br>(c) Consider use of a flow diagram                        |               |
| Descriptive data             | 14*     | (a) Give characteristics of study participants (eg demographic, clinical, social) and information on exposures and potential confounders<br>(b) Indicate number of participants with missing data for each variable of interest<br>(c) Summarise follow-up time (eg, average and total amount)                         |               |
| Outcome data                 | 15*     | Report numbers of outcome events or summary measures over time                                                                                                                                                                                                                                                         | 7,8,9         |

|    |                          |    |                                                                                                                                                                                                              |             |
|----|--------------------------|----|--------------------------------------------------------------------------------------------------------------------------------------------------------------------------------------------------------------|-------------|
| 1  | Main results             | 16 | (a) Give unadjusted estimates and, if applicable, confounder-adjusted estimates and their precision (eg, 95% confidence interval). Make clear which confounders were adjusted for and why they were included | 7,8,9       |
| 2  |                          |    | (b) Report category boundaries when continuous variables were categorized                                                                                                                                    |             |
| 3  |                          |    | (c) If relevant, consider translating estimates of relative risk into absolute risk for a meaningful time period                                                                                             |             |
| 4  |                          |    |                                                                                                                                                                                                              |             |
| 5  |                          |    |                                                                                                                                                                                                              |             |
| 6  |                          |    |                                                                                                                                                                                                              |             |
| 7  |                          |    |                                                                                                                                                                                                              |             |
| 8  |                          |    |                                                                                                                                                                                                              |             |
| 9  | Other analyses           | 17 | Report other analyses done—eg analyses of subgroups and interactions, and sensitivity analyses                                                                                                               | 9           |
| 10 |                          |    |                                                                                                                                                                                                              |             |
| 11 | <b>Discussion</b>        |    |                                                                                                                                                                                                              |             |
| 12 |                          |    |                                                                                                                                                                                                              |             |
| 13 | Key results              | 18 | Summarise key results with reference to study objectives                                                                                                                                                     | 11          |
| 14 | Limitations              | 19 | Discuss limitations of the study, taking into account sources of potential bias or imprecision. Discuss both direction and magnitude of any potential bias                                                   | 11,12,13    |
| 15 |                          |    |                                                                                                                                                                                                              |             |
| 16 | Interpretation           | 20 | Give a cautious overall interpretation of results considering objectives, limitations, multiplicity of analyses, results from similar studies, and other relevant evidence                                   | 12,13,14,15 |
| 17 |                          |    |                                                                                                                                                                                                              |             |
| 18 |                          |    |                                                                                                                                                                                                              |             |
| 19 | Generalisability         | 21 | Discuss the generalisability (external validity) of the study results                                                                                                                                        | 15          |
| 20 |                          |    |                                                                                                                                                                                                              |             |
| 21 | <b>Other information</b> |    |                                                                                                                                                                                                              |             |
| 22 | Funding                  | 22 | Give the source of funding and the role of the funders for the present study and, if applicable, for the original study on which the present article is based                                                | 16          |
| 23 |                          |    |                                                                                                                                                                                                              |             |
| 24 |                          |    |                                                                                                                                                                                                              |             |

25  
26 \*Give information separately for exposed and unexposed groups.

27  
28 **Note:** An Explanation and Elaboration article discusses each checklist item and gives methodological background and  
29 published examples of transparent reporting. The STROBE checklist is best used in conjunction with this article (freely  
30 available on the Web sites of PLoS Medicine at <http://www.plosmedicine.org/>, Annals of Internal Medicine at  
31 <http://www.annals.org/>, and Epidemiology at <http://www.epidem.com/>). Information on the STROBE Initiative is  
32 available at <http://www.strobe-statement.org>.  
33  
34  
35  
36  
37  
38  
39  
40  
41  
42  
43  
44  
45  
46  
47  
48  
49  
50  
51  
52  
53  
54  
55  
56  
57  
58  
59  
60
